# Supplementary material for: The prevalence of patient engagement in published trials: a systematic review
Source: PubMed Central journal article supplement (PMC5963039; doi:10.1186/s40900-018-0099-x), 2018-05-22
Supplement: 40900_2018_99_MOESM2_ESM.pdf [file 40900_2018_99_MOESM2_ESM.pdf]

**ADDITIONAL FILE 2**

**Table 2. Full study characteristics of included studies.**

† Denotes where excerpts are taken verbatim from study.

| Study              | Country of conduct | Title                                                                                                                                                                        | Multi-centre/<br>single centre | Sample Size | Field/Topic                   | Ethnic/Minority populations       | Number of patients/community representatives engaged in research | Methods of Engagement <sup>†</sup>      |                          |                                                                                                                                                                                |                                                    |
|--------------------|--------------------|------------------------------------------------------------------------------------------------------------------------------------------------------------------------------|--------------------------------|-------------|-------------------------------|-----------------------------------|------------------------------------------------------------------|-----------------------------------------|--------------------------|--------------------------------------------------------------------------------------------------------------------------------------------------------------------------------|----------------------------------------------------|
|                    |                    |                                                                                                                                                                              |                                |             |                               |                                   |                                                                  | <i>Development of research question</i> | <i>Selecting outcome</i> | <i>Other activities</i>                                                                                                                                                        | <i>Dissemination and Implementation of results</i> |
| Pearson, 2014 [33] | USA                | Capacity building from the inside out: Development and evaluation of a CITI ethics certification training module for American Indian and Alaska native community researchers | Multi-centre                   | 44          | Human subject training module | American Indian and Alaska Native | 4                                                                | Not reported                            | Not reported             | During our first expert panel review with the AI/AN community members, we reviewed all three modules and community members discussed preference and importance of each module. | Not reported                                       |

**ADDITIONAL FILE 2**

**Table 2. Full study characteristics of included studies.**

† Denotes where excerpts are taken verbatim from study.

| Study | Country of conduct | Title | Multi-centre/<br>single centre | Sample Size | Field/Topic | Ethnic/Minority populations | Number of patients/community representatives engaged in research | Methods of Engagement <sup>†</sup>      |                          |                         |                                                                                                                                                                                              |
|-------|--------------------|-------|--------------------------------|-------------|-------------|-----------------------------|------------------------------------------------------------------|-----------------------------------------|--------------------------|-------------------------|----------------------------------------------------------------------------------------------------------------------------------------------------------------------------------------------|
|       |                    |       |                                |             |             |                             |                                                                  | <i>Development of research question</i> | <i>Selecting outcome</i> | <i>Other activities</i> | <i>Dissemination and Implementation of results</i>                                                                                                                                           |
|       |                    |       |                                |             |             |                             |                                                                  |                                         |                          |                         | Members prioritized the assessing risk and benefit module as they believed this was where researchers often made the biggest mistakes. Also they stated this was where community researchers |

**ADDITIONAL FILE 2**

**Table 2. Full study characteristics of included studies.**

† Denotes where excerpts are taken verbatim from study.

| Study | Country of conduct | Title | Multi-centre/<br>single centre | Sample Size | Field/Topic | Ethnic/Minority populations | Number of patients/community representatives engaged in research | Methods of Engagement <sup>†</sup> |                   |                  |                                                                                                                                                                                               |
|-------|--------------------|-------|--------------------------------|-------------|-------------|-----------------------------|------------------------------------------------------------------|------------------------------------|-------------------|------------------|-----------------------------------------------------------------------------------------------------------------------------------------------------------------------------------------------|
|       |                    |       |                                |             |             |                             |                                                                  | Development of research question   | Selecting outcome | Other activities | Dissemination and Implementation of results                                                                                                                                                   |
|       |                    |       |                                |             |             |                             |                                                                  |                                    |                   |                  | are often referred to in reviewing research protocols. The Community Panel provided the first level of review. They made recommendations for changes that would meet the needs of local AI/AN |



**ADDITIONAL FILE 2**

**Table 2. Full study characteristics of included studies.**

† Denotes where excerpts are taken verbatim from study.

| Study | Country of conduct | Title | Multi-centre/<br>single centre | Sample Size | Field/Topic | Ethnic/Minority populations | Number of patients/ community representatives engaged in research | Methods of Engagement <sup>†</sup> |                   |                  |                                             |                                                                                                                                                                                                                                                                      |
|-------|--------------------|-------|--------------------------------|-------------|-------------|-----------------------------|-------------------------------------------------------------------|------------------------------------|-------------------|------------------|---------------------------------------------|----------------------------------------------------------------------------------------------------------------------------------------------------------------------------------------------------------------------------------------------------------------------|
|       |                    |       |                                |             |             |                             |                                                                   | Development of research question   | Selecting outcome | Other activities | Dissemination and Implementation of results |                                                                                                                                                                                                                                                                      |
|       |                    |       |                                |             |             |                             |                                                                   |                                    |                   |                  |                                             | investigator<br>s and the<br>panel<br>reviewed<br>the core<br>element<br>matrix and<br>then<br>reviewed<br>the module<br>section by<br>section.<br>Changes to<br>the original<br>module<br>were made.<br>In the final,<br>fifth step we<br>sent the<br>final version |

**ADDITIONAL FILE 2**

**Table 2. Full study characteristics of included studies.**

† Denotes where excerpts are taken verbatim from study.

| Study               | Country of conduct | Title                                | Multi-centre/<br>single centre | Sample Size | Field/Topic         | Ethnic/Minority populations | Number of patients/communit<br>y represent<br>atives engaged<br>in<br>research | Methods of Engagement <sup>†</sup>                   |                                        |                                    |                                                                                          |
|---------------------|--------------------|--------------------------------------|--------------------------------|-------------|---------------------|-----------------------------|--------------------------------------------------------------------------------|------------------------------------------------------|----------------------------------------|------------------------------------|------------------------------------------------------------------------------------------|
|                     |                    |                                      |                                |             |                     |                             |                                                                                | <i>Develop<br/>ment of<br/>research<br/>question</i> | <i>Selec<br/>ting<br/>outco<br/>me</i> | <i>Other<br/>activities</i>        | <i>Dissemin<br/>ation and<br/>Implemen<br/>tation of<br/>results</i>                     |
|                     |                    |                                      |                                |             |                     |                             |                                                                                |                                                      |                                        |                                    | out to all panel members for their review. Only minor editorial comments were suggested. |
| Mitchell, 2013 [24] | UK                 | The development and pilot testing of | Multi-centre                   | 37          | chronic obstructive | Not reported                | 24                                                                             | The pulmonary rehabilit                              | Not reported                           | The pulmonary rehabilitation team, | Not reported                                                                             |

**ADDITIONAL FILE 2**

**Table 2. Full study characteristics of included studies.**

† Denotes where excerpts are taken verbatim from study.

| Study | Country of conduct | Title                                                                                                                      | Multi-centre/<br>single centre | Sample Size | Field/Topic       | Ethnic/Minority populations | Number of patients/communities<br>representatives engaged in research | Methods of Engagement <sup>†</sup>                                                                                                      |                                                                                                                                                                                             |                  |                                             |
|-------|--------------------|----------------------------------------------------------------------------------------------------------------------------|--------------------------------|-------------|-------------------|-----------------------------|-----------------------------------------------------------------------|-----------------------------------------------------------------------------------------------------------------------------------------|---------------------------------------------------------------------------------------------------------------------------------------------------------------------------------------------|------------------|---------------------------------------------|
|       |                    |                                                                                                                            |                                |             |                   |                             |                                                                       | Development of research question                                                                                                        | Selection outcome                                                                                                                                                                           | Other activities | Dissemination and Implementation of results |
|       |                    | the Self-management Programme of Activity, Coping and Education for Chronic Obstructive Pulmonary Disease (SPACE for COPD) |                                |             | pulmonary disease |                             |                                                                       | ation team, patients, and health care professionals with expertise in particular topics were involved in the initial development of the | patients, and health care professionals with expertise in particular topics were involved in the initial development of the content and this was further refined through collaboration with |                  |                                             |

**ADDITIONAL FILE 2**

**Table 2. Full study characteristics of included studies.**

† Denotes where excerpts are taken verbatim from study.

| Study | Country of conduct | Title | Multi-centre/<br>single centre | Sample Size | Field/Topic | Ethnic/<br>Minority populations | Number of patients/<br>community representatives engaged in research | Methods of Engagement <sup>†</sup>                                                                                                                                                                                                                |                                                                                                                                                                                    |                  |                                             |
|-------|--------------------|-------|--------------------------------|-------------|-------------|---------------------------------|----------------------------------------------------------------------|---------------------------------------------------------------------------------------------------------------------------------------------------------------------------------------------------------------------------------------------------|------------------------------------------------------------------------------------------------------------------------------------------------------------------------------------|------------------|---------------------------------------------|
|       |                    |       |                                |             |             |                                 |                                                                      | Development of research question                                                                                                                                                                                                                  | Selecting outcome                                                                                                                                                                  | Other activities | Dissemination and Implementation of results |
|       |                    |       |                                |             |             |                                 |                                                                      | content and this was further refined through collaboration with professionals and patients. Once a draft manual was developed, FGs were conducted to review the manual content and determine preferences for the delivery of such a program based | professional s and patients. Once a draft manual was developed, FGs were conducted to review the manual content and determine preferences for the delivery of such a program based |                  |                                             |



**ADDITIONAL FILE 2**

**Table 2. Full study characteristics of included studies.**

† Denotes where excerpts are taken verbatim from study.

| Study | Country of conduct | Title | Multi-centre/<br>single centre | Sample Size | Field/Topic | Ethnic/Minority populations | Number of patients/ community representatives engaged in research | Methods of Engagement <sup>†</sup>                                                                                           |                          |                         |                                                                                                                                                                       |  |
|-------|--------------------|-------|--------------------------------|-------------|-------------|-----------------------------|-------------------------------------------------------------------|------------------------------------------------------------------------------------------------------------------------------|--------------------------|-------------------------|-----------------------------------------------------------------------------------------------------------------------------------------------------------------------|--|
|       |                    |       |                                |             |             |                             |                                                                   | <i>Development of research question</i>                                                                                      | <i>Selecting outcome</i> | <i>Other activities</i> | <i>Dissemination and Implementation of results</i>                                                                                                                    |  |
|       |                    |       |                                |             |             |                             |                                                                   | conducted to review the manual content and determine preferences for the delivery of such a program based around a manual to |                          |                         | around a manual to support self-management. The FG schedule was structured to ensure new topics could arise; minor revisions were made to it after the first two FGs. |  |

**ADDITIONAL FILE 2**

**Table 2. Full study characteristics of included studies.**

† Denotes where excerpts are taken verbatim from study.

| Study | Country of conduct | Title | Multi-centre/<br>single centre | Sample Size | Field/Topic | Ethnic/Minority populations | Number of patients/ community representatives engaged in research | Methods of Engagement†                                                                                           |                   |                  |                                             |  |  |  |
|-------|--------------------|-------|--------------------------------|-------------|-------------|-----------------------------|-------------------------------------------------------------------|------------------------------------------------------------------------------------------------------------------|-------------------|------------------|---------------------------------------------|--|--|--|
|       |                    |       |                                |             |             |                             |                                                                   | Development of research question                                                                                 | Selecting outcome | Other activities | Dissemination and Implementation of results |  |  |  |
|       |                    |       |                                |             |             |                             |                                                                   | support self-management.                                                                                         |                   |                  |                                             |  |  |  |
|       |                    |       |                                |             |             |                             |                                                                   | The FG schedule was structured to ensure new topics could arise; minor revisions were made to it after the first |                   |                  |                                             |  |  |  |

**ADDITIONAL FILE 2**

**Table 2. Full study characteristics of included studies.**

† Denotes where excerpts are taken verbatim from study.

| Study               | Country of conduct | Title                                                                                                             | Multi-centre/<br>single centre | Sample Size | Field/Topic              | Ethnic/Minority populations | Number of patients/ community representatives engaged in research | Methods of Engagement <sup>†</sup>                                                                           |                          |                                                                                                 |                                                    |
|---------------------|--------------------|-------------------------------------------------------------------------------------------------------------------|--------------------------------|-------------|--------------------------|-----------------------------|-------------------------------------------------------------------|--------------------------------------------------------------------------------------------------------------|--------------------------|-------------------------------------------------------------------------------------------------|----------------------------------------------------|
|                     |                    |                                                                                                                   |                                |             |                          |                             |                                                                   | <i>Development of research question</i>                                                                      | <i>Selecting outcome</i> | <i>Other activities</i>                                                                         | <i>Dissemination and Implementation of results</i> |
|                     |                    |                                                                                                                   |                                |             |                          |                             |                                                                   | two FGs.                                                                                                     |                          |                                                                                                 |                                                    |
| Halanych, 2012 [36] | USA                | Recruitment of a rural, southern, predominantly African-American population into a diabetes self-management trial | Multiple sites                 | 384         | diabetes self-management | African-American            | Not reported                                                      | Prior to developing and submitting the study proposal for funding, study investigators carried out community | Not reported             | Study investigators solicited input on study design as well as advice on recruitment approaches | Not reported                                       |

**ADDITIONAL FILE 2**

**Table 2. Full study characteristics of included studies.**

† Denotes where excerpts are taken verbatim from study.

| Study | Country of conduct | Title | Multi-centre/<br>single centre | Sample Size | Field/Topic | Ethnic/Minority populations | Number of patients/community representatives engaged in research | Methods of Engagement <sup>†</sup>                                               |                   |                  |                                             |  |
|-------|--------------------|-------|--------------------------------|-------------|-------------|-----------------------------|------------------------------------------------------------------|----------------------------------------------------------------------------------|-------------------|------------------|---------------------------------------------|--|
|       |                    |       |                                |             |             |                             |                                                                  | Development of research question                                                 | Selection outcome | Other activities | Dissemination and Implementation of results |  |
|       |                    |       |                                |             |             |                             |                                                                  | engage<br>ment                                                                   |                   |                  |                                             |  |
|       |                    |       |                                |             |             |                             |                                                                  | activities<br>by<br>partnerin<br>g with<br>an<br>ongoing<br>commun<br>ity        |                   |                  |                                             |  |
|       |                    |       |                                |             |             |                             |                                                                  | coalition<br>establish<br>ed for<br>cancer<br>preventi<br>on<br>improve<br>ment. |                   |                  |                                             |  |

**ADDITIONAL FILE 2**

**Table 2. Full study characteristics of included studies.**

† Denotes where excerpts are taken verbatim from study.

| Study | Country of conduct | Title | Multi-centre/<br>single centre | Sample Size | Field/Topic | Ethnic/<br>Minority populations | Number of patients/<br>community representatives engaged in research | Methods of Engagement†                                                                                                              |                   |                  |                                             |  |
|-------|--------------------|-------|--------------------------------|-------------|-------------|---------------------------------|----------------------------------------------------------------------|-------------------------------------------------------------------------------------------------------------------------------------|-------------------|------------------|---------------------------------------------|--|
|       |                    |       |                                |             |             |                                 |                                                                      | Development of research question                                                                                                    | Selecting outcome | Other activities | Dissemination and Implementation of results |  |
|       |                    |       |                                |             |             |                                 |                                                                      | Coalition meetings had consistently included calls for diabetes programs, prompting this proposal, and when the study team received |                   |                  |                                             |  |

**ADDITIONAL FILE 2**

**Table 2. Full study characteristics of included studies.**

† Denotes where excerpts are taken verbatim from study.

| Study | Country of conduct | Title | Multi-centre/<br>single centre | Sample Size | Field/Topic | Ethnic/Minority populations | Number of patients/community representatives engaged in research | Methods of Engagement <sup>†</sup>                       |                   |                  |                                             |  |  |
|-------|--------------------|-------|--------------------------------|-------------|-------------|-----------------------------|------------------------------------------------------------------|----------------------------------------------------------|-------------------|------------------|---------------------------------------------|--|--|
|       |                    |       |                                |             |             |                             |                                                                  | Development of research question                         | Selecting outcome | Other activities | Dissemination and Implementation of results |  |  |
|       |                    |       |                                |             |             |                             |                                                                  | notice of funding, they collaborated with                |                   |                  |                                             |  |  |
|       |                    |       |                                |             |             |                             |                                                                  | this coalition to hold a discussion group with community |                   |                  |                                             |  |  |
|       |                    |       |                                |             |             |                             |                                                                  | members. With this discussion                            |                   |                  |                                             |  |  |

**ADDITIONAL FILE 2**

**Table 2. Full study characteristics of included studies.**

† Denotes where excerpts are taken verbatim from study.

| Study | Country of conduct | Title | Multi-centre/<br>single centre | Sample Size | Field/Topic | Ethnic/<br>Minority populations | Number of patients/<br>community representatives engaged in research | Methods of Engagement <sup>†</sup>      |                                                                  |                         |                                                    |            |
|-------|--------------------|-------|--------------------------------|-------------|-------------|---------------------------------|----------------------------------------------------------------------|-----------------------------------------|------------------------------------------------------------------|-------------------------|----------------------------------------------------|------------|
|       |                    |       |                                |             |             |                                 |                                                                      | <i>Development of research question</i> | <i>Selecting outcome</i>                                         | <i>Other activities</i> | <i>Dissemination and Implementation of results</i> |            |
|       |                    |       |                                |             |             |                                 |                                                                      | group, study investigators              | solicited input on study design as well as advice on recruitment |                         |                                                    | approaches |

**ADDITIONAL FILE 2**

**Table 2. Full study characteristics of included studies.**

† Denotes where excerpts are taken verbatim from study.

| Study                   | Country of conduct | Title                                                                                                                | Multi-centre/ single centre | Sample Size | Field/ Topic           | Ethnic/ Minority populations | Number of patients/ community representatives engaged in research | Methods of Engagement <sup>†</sup>      |                          |                                                                                                                                                                                              |                                                                                                                                                                       |
|-------------------------|--------------------|----------------------------------------------------------------------------------------------------------------------|-----------------------------|-------------|------------------------|------------------------------|-------------------------------------------------------------------|-----------------------------------------|--------------------------|----------------------------------------------------------------------------------------------------------------------------------------------------------------------------------------------|-----------------------------------------------------------------------------------------------------------------------------------------------------------------------|
|                         |                    |                                                                                                                      |                             |             |                        |                              |                                                                   | <i>Development of research question</i> | <i>Selecting outcome</i> | <i>Other activities</i>                                                                                                                                                                      | <i>Dissemination and Implementation of results</i>                                                                                                                    |
| Bogart, L.M., 2013 [21] | USA                | A Randomized Controlled Trial of Students for Nutrition and eXercise: A Community-Based Participatory Research Study | Multiple sites              | 2997        | Nutrition and Exercise | Not reported                 | Not reported                                                      | Not reported                            | Not reported             | Consistent with CBPR principles [18], school district administrators served on the study leadership team and were integral and equal partners in all research phases, including intervention | Consistent with CBPR principles [18], school district administrators served on the study leadership team and were integral and equal partners in all research phases, |





**ADDITIONAL FILE 2**

**Table 2. Full study characteristics of included studies.**

† Denotes where excerpts are taken verbatim from study.

| Study | Country of conduct | Title | Multi-centre/<br>single centre | Sample Size | Field/Topic | Ethnic/<br>Minority populations | Number of patients/<br>community representatives engaged in research | Methods of Engagement <sup>†</sup>      |                                                                                                                                                                                         |                         |                                                                                                                                                             |
|-------|--------------------|-------|--------------------------------|-------------|-------------|---------------------------------|----------------------------------------------------------------------|-----------------------------------------|-----------------------------------------------------------------------------------------------------------------------------------------------------------------------------------------|-------------------------|-------------------------------------------------------------------------------------------------------------------------------------------------------------|
|       |                    |       |                                |             |             |                                 |                                                                      | <i>Development of research question</i> | <i>Selecting outcome</i>                                                                                                                                                                | <i>Other activities</i> | <i>Dissemination and Implementation of results</i>                                                                                                          |
|       |                    |       |                                |             |             |                                 |                                                                      |                                         | adolescent obesity prevention (e.g., from LAUSD administration, parent groups, Los Angeles County's health department, youth-serving organizations, and research institutions) provided |                         | contributed to community partnership investment and led to ongoing efforts toward wide-scale program dissemination. For example, the use of CBPR during the |

**ADDITIONAL FILE 2**

**Table 2. Full study characteristics of included studies.**

† Denotes where excerpts are taken verbatim from study.

| Study | Country of conduct | Title | Multi-centre/ single centre | Sample Size | Field/ Topic | Ethnic/ Minority populations | Number of patients/ community representatives engaged in research | Methods of Engagement†           |                   |                                                             |                                                                                                                                                     |
|-------|--------------------|-------|-----------------------------|-------------|--------------|------------------------------|-------------------------------------------------------------------|----------------------------------|-------------------|-------------------------------------------------------------|-----------------------------------------------------------------------------------------------------------------------------------------------------|
|       |                    |       |                             |             |              |                              |                                                                   | Development of research question | Selection outcome | Other activities                                            | Dissemination and Implementation of results                                                                                                         |
|       |                    |       |                             |             |              |                              |                                                                   |                                  |                   | critical input and direction in regular in-person meetings. | intervention development and pilot testing phases contributed to the long-term sustainability of some of the environmental aspects of SNaX, through |



**ADDITIONAL FILE 2**

**Table 2. Full study characteristics of included studies.**

† Denotes where excerpts are taken verbatim from study.

| Study | Country of conduct | Title | Multi-centre/<br>single centre | Sample Size | Field/Topic | Ethnic/<br>Minority populations | Number of patients/<br>community representatives engaged in research | Methods of Engagement <sup>†</sup>      |                          |                         |                                                    |                                                                                                                                                            |
|-------|--------------------|-------|--------------------------------|-------------|-------------|---------------------------------|----------------------------------------------------------------------|-----------------------------------------|--------------------------|-------------------------|----------------------------------------------------|------------------------------------------------------------------------------------------------------------------------------------------------------------|
|       |                    |       |                                |             |             |                                 |                                                                      | <i>Development of research question</i> | <i>Selecting outcome</i> | <i>Other activities</i> | <i>Dissemination and Implementation of results</i> |                                                                                                                                                            |
|       |                    |       |                                |             |             |                                 |                                                                      |                                         |                          |                         |                                                    | fruits. Furthermore, a Community board advisory member shared with a state-elected official our pilot study finding that key school leaders said that free |

**ADDITIONAL FILE 2**

**Table 2. Full study characteristics of included studies.**

† Denotes where excerpts are taken verbatim from study.

| Study | Country of conduct | Title | Multi-centre/ single centre | Sample Size | Field/ Topic | Ethnic/ Minority populations | Number of patients/ community representatives engaged in research | Methods of Engagement <sup>†</sup> |                   |                  |                                             |                                                                                                                                                                                   |
|-------|--------------------|-------|-----------------------------|-------------|--------------|------------------------------|-------------------------------------------------------------------|------------------------------------|-------------------|------------------|---------------------------------------------|-----------------------------------------------------------------------------------------------------------------------------------------------------------------------------------|
|       |                    |       |                             |             |              |                              |                                                                   | Development of research question   | Selecting outcome | Other activities | Dissemination and Implementation of results |                                                                                                                                                                                   |
|       |                    |       |                             |             |              |                              |                                                                   |                                    |                   |                  |                                             | drinking water could not be made available with the school meal and helped to draft legislation , informed by our formative work. . In addition, the school district is presently |

**ADDITIONAL FILE 2**

**Table 2. Full study characteristics of included studies.**

† Denotes where excerpts are taken verbatim from study.

| Study | Country of conduct | Title | Multi-centre/ single centre | Sample Size | Field/ Topic | Ethnic/ Minority populations | Number of patients/ community representatives engaged in research | Methods of Engagement†                  |                          |                         |                                                    |                                                                                                                                                             |
|-------|--------------------|-------|-----------------------------|-------------|--------------|------------------------------|-------------------------------------------------------------------|-----------------------------------------|--------------------------|-------------------------|----------------------------------------------------|-------------------------------------------------------------------------------------------------------------------------------------------------------------|
|       |                    |       |                             |             |              |                              |                                                                   | <i>Development of research question</i> | <i>Selecting outcome</i> | <i>Other activities</i> | <i>Dissemination and Implementation of results</i> |                                                                                                                                                             |
|       |                    |       |                             |             |              |                              |                                                                   |                                         |                          |                         |                                                    | committed to wide-scale, ongoing dissemination of the program and is working with the research team to develop a sustainable model to implement SNaX across |

**ADDITIONAL FILE 2**

**Table 2. Full study characteristics of included studies.**

† Denotes where excerpts are taken verbatim from study.

| Study                       | Country of conduct | Title                                                                                                            | Multi-centre/ single centre | Sample Size | Field/ Topic | Ethnic/ Minority populations                                                  | Number of patients/ community representatives engaged in research | Methods of Engagement <sup>†</sup> |                   |                                                                                                                                                           |                                                                                                                                 |
|-----------------------------|--------------------|------------------------------------------------------------------------------------------------------------------|-----------------------------|-------------|--------------|-------------------------------------------------------------------------------|-------------------------------------------------------------------|------------------------------------|-------------------|-----------------------------------------------------------------------------------------------------------------------------------------------------------|---------------------------------------------------------------------------------------------------------------------------------|
|                             |                    |                                                                                                                  |                             |             |              |                                                                               |                                                                   | Development of research question   | Selection outcome | Other activities                                                                                                                                          | Dissemination and Implementation of results                                                                                     |
|                             |                    |                                                                                                                  |                             |             |              |                                                                               |                                                                   |                                    |                   |                                                                                                                                                           | the district.                                                                                                                   |
| Kaholokula, J.K., 2012 [31] | USA                | A Family and Community Focused Lifestyle Program Prevents Weight Regain in Pacific Islanders: A Pilot Randomized | Multiple sites              | 144         | Obesity      | Pacific Islanders, such as Native Hawaiians, Samoans, Chuukese, and Filipinos | Not reported                                                      | Not reported                       | Not Reported      | Guiding the design of our pilot RCT was a CBPR approach in which the POP's community partners worked side-by-side with the academic partners in designing | "As shared earlier, the community partners identified the research topic and provided input into how the CBPR partnership would |



**ADDITIONAL FILE 2**

**Table 2. Full study characteristics of included studies.**

† Denotes where excerpts are taken verbatim from study.

| Study | Country of conduct | Title            | Multi-centre/<br>single centre | Sample Size | Field/Topic | Ethnic/Minority populations | Number of patients/ community representatives engaged in research | Methods of Engagement†           |                   |                  |                                             |                                                                                                                                                                                          |                                                                                                                                                                       |
|-------|--------------------|------------------|--------------------------------|-------------|-------------|-----------------------------|-------------------------------------------------------------------|----------------------------------|-------------------|------------------|---------------------------------------------|------------------------------------------------------------------------------------------------------------------------------------------------------------------------------------------|-----------------------------------------------------------------------------------------------------------------------------------------------------------------------|
|       |                    |                  |                                |             |             |                             |                                                                   | Development of research question | Selecting outcome | Other activities | Dissemination and Implementation of results |                                                                                                                                                                                          |                                                                                                                                                                       |
|       |                    | Controlled Trial |                                |             |             |                             |                                                                   |                                  |                   |                  |                                             | the PLP O and in determining the study design as described in detail by Nacapoy et al. (2008) and by Mau et al. (2010). "We employed a CBPR approach whereby community members served as | be structured and how the study would be designed and implemented. They also own their own data and determine how the information is disseminated in their respective |

**ADDITIONAL FILE 2**

**Table 2. Full study characteristics of included studies.**

† Denotes where excerpts are taken verbatim from study.

| Study | Country of conduct | Title | Multi-centre/<br>single centre | Sample Size | Field/Topic | Ethnic/<br>Minority populations | Number of patients/<br>community representatives engaged in research | Methods of Engagement <sup>†</sup>      |                                                                                                                                                          |                         |                                                    |
|-------|--------------------|-------|--------------------------------|-------------|-------------|---------------------------------|----------------------------------------------------------------------|-----------------------------------------|----------------------------------------------------------------------------------------------------------------------------------------------------------|-------------------------|----------------------------------------------------|
|       |                    |       |                                |             |             |                                 |                                                                      | <i>Development of research question</i> | <i>Selecting outcome</i>                                                                                                                                 | <i>Other activities</i> | <i>Dissemination and Implementation of results</i> |
|       |                    |       |                                |             |             |                                 |                                                                      |                                         | co-researchers                                                                                                                                           | communities. "          |                                                    |
|       |                    |       |                                |             |             |                                 |                                                                      |                                         | (with co-equal decision making) in all aspects of designing and testing the intervention ; in delivering the intervention s via community-peer educators |                         |                                                    |

**ADDITIONAL FILE 2**

**Table 2. Full study characteristics of included studies.**

† Denotes where excerpts are taken verbatim from study.

| Study | Country of conduct | Title | Multi-centre/<br>single centre | Sample Size | Field/Topic | Ethnic/Minority populations | Number of patients/community representatives engaged in research | Methods of Engagement <sup>†</sup>      |                          |                         |                                                    |                                                                                                                                            |
|-------|--------------------|-------|--------------------------------|-------------|-------------|-----------------------------|------------------------------------------------------------------|-----------------------------------------|--------------------------|-------------------------|----------------------------------------------------|--------------------------------------------------------------------------------------------------------------------------------------------|
|       |                    |       |                                |             |             |                             |                                                                  | <i>Development of research question</i> | <i>Selecting outcome</i> | <i>Other activities</i> | <i>Dissemination and Implementation of results</i> |                                                                                                                                            |
|       |                    |       |                                |             |             |                             |                                                                  |                                         |                          |                         |                                                    | within their respective communities; and in having community researchers collect baseline and outcome data based on standardized protocol" |
|       |                    |       |                                |             |             |                             |                                                                  |                                         |                          |                         |                                                    | From Nacapoey "Through a                                                                                                                   |

**ADDITIONAL FILE 2**

**Table 2. Full study characteristics of included studies.**

† Denotes where excerpts are taken verbatim from study.

| Study | Country of conduct | Title | Multi-centre/<br>single centre | Sample Size | Field/Topic | Ethnic/Minority populations | Number of patients/community representatives engaged in research | Methods of Engagement <sup>†</sup>      |                          |                         |                                                                                                                                                                                  |
|-------|--------------------|-------|--------------------------------|-------------|-------------|-----------------------------|------------------------------------------------------------------|-----------------------------------------|--------------------------|-------------------------|----------------------------------------------------------------------------------------------------------------------------------------------------------------------------------|
|       |                    |       |                                |             |             |                             |                                                                  | <i>Development of research question</i> | <i>Selecting outcome</i> | <i>Other activities</i> | <i>Dissemination and Implementation of results</i>                                                                                                                               |
|       |                    |       |                                |             |             |                             |                                                                  |                                         |                          |                         | series of meetings facilitated by the Community and Academic Co-Directors, the community-academic partnership negotiated a mutually acceptable research design and protocol that |

**ADDITIONAL FILE 2**

**Table 2. Full study characteristics of included studies.**

† Denotes where excerpts are taken verbatim from study.

| Study | Country of conduct | Title | Multi-centre/<br>single centre | Sample Size | Field/Topic | Ethnic/Minority populations | Number of patients/community representatives engaged in research | Methods of Engagement <sup>†</sup> |                   |                  |                                             |                                                                                                                                                                                           |
|-------|--------------------|-------|--------------------------------|-------------|-------------|-----------------------------|------------------------------------------------------------------|------------------------------------|-------------------|------------------|---------------------------------------------|-------------------------------------------------------------------------------------------------------------------------------------------------------------------------------------------|
|       |                    |       |                                |             |             |                             |                                                                  | Development of research question   | Selecting outcome | Other activities | Dissemination and Implementation of results |                                                                                                                                                                                           |
|       |                    |       |                                |             |             |                             |                                                                  |                                    |                   |                  |                                             | engaged the community partners as well as maintained scientific rigor. The PILI `Ohana Project partners struggled with the scientific perspective and experimental design issues, such as |

**ADDITIONAL FILE 2**

**Table 2. Full study characteristics of included studies.**

† Denotes where excerpts are taken verbatim from study.

| Study | Country of conduct | Title | Multi-centre/<br>single centre | Sample Size | Field/Topic | Ethnic/<br>Minority populations | Number of patients/<br>community representatives engaged in research | Methods of Engagement <sup>†</sup>      |                          |                         |                                                    |                                                                                                                                                                                                   |
|-------|--------------------|-------|--------------------------------|-------------|-------------|---------------------------------|----------------------------------------------------------------------|-----------------------------------------|--------------------------|-------------------------|----------------------------------------------------|---------------------------------------------------------------------------------------------------------------------------------------------------------------------------------------------------|
|       |                    |       |                                |             |             |                                 |                                                                      | <i>Development of research question</i> | <i>Selecting outcome</i> | <i>Other activities</i> | <i>Dissemination and Implementation of results</i> |                                                                                                                                                                                                   |
|       |                    |       |                                |             |             |                                 |                                                                      |                                         |                          |                         |                                                    | using a randomized controlled trial (RCT) protocol, in which participants are randomly assigned to either the intervention being evaluated or to a control group. From the community perspective, |

**ADDITIONAL FILE 2**

**Table 2. Full study characteristics of included studies.**

† Denotes where excerpts are taken verbatim from study.

| Study | Country of conduct | Title | Multi-centre/<br>single centre | Sample Size | Field/Topic | Ethnic/<br>Minority populations | Number of patients/<br>community representatives engaged in research | Methods of Engagement <sup>†</sup> |                   |                  |                                                                                                                                                                                                        |
|-------|--------------------|-------|--------------------------------|-------------|-------------|---------------------------------|----------------------------------------------------------------------|------------------------------------|-------------------|------------------|--------------------------------------------------------------------------------------------------------------------------------------------------------------------------------------------------------|
|       |                    |       |                                |             |             |                                 |                                                                      | Development of research question   | Selecting outcome | Other activities | Dissemination and Implementation of results                                                                                                                                                            |
|       |                    |       |                                |             |             |                                 |                                                                      |                                    |                   |                  | intervention needed to ensure that no participant was denied or delayed in receiving a possibly effective intervention . In balancing these 2 perspectives, the partners agreed upon a RCT design that |

**ADDITIONAL FILE 2**

**Table 2. Full study characteristics of included studies.**

† Denotes where excerpts are taken verbatim from study.

| Study | Country of conduct | Title | Multi-centre/<br>single centre | Sample Size | Field/Topic | Ethnic/<br>Minority populations | Number of patients/<br>community representatives engaged in research | Methods of Engagement <sup>†</sup> |                   |                  |                                             |                                                                                                                                                                                                  |
|-------|--------------------|-------|--------------------------------|-------------|-------------|---------------------------------|----------------------------------------------------------------------|------------------------------------|-------------------|------------------|---------------------------------------------|--------------------------------------------------------------------------------------------------------------------------------------------------------------------------------------------------|
|       |                    |       |                                |             |             |                                 |                                                                      | Development of research question   | Selecting outcome | Other activities | Dissemination and Implementation of results |                                                                                                                                                                                                  |
|       |                    |       |                                |             |             |                                 |                                                                      |                                    |                   |                  |                                             | ensured all participants would receive an active intervention while still being able to scientifically test the efficacy of the weight loss maintenance intervention ....To build the communitie |



**ADDITIONAL FILE 2**

**Table 2. Full study characteristics of included studies.**

† Denotes where excerpts are taken verbatim from study.

| Study | Country of conduct | Title | Multi-centre/singl e centre | Sample Size | Field/ Topic | Ethnic/ Minority populations | Number of patients/ community representatives engaged in research | Methods of Engagement <sup>†</sup>      |                          |                         |                                                    |                                                                                                                                                                                                              |
|-------|--------------------|-------|-----------------------------|-------------|--------------|------------------------------|-------------------------------------------------------------------|-----------------------------------------|--------------------------|-------------------------|----------------------------------------------------|--------------------------------------------------------------------------------------------------------------------------------------------------------------------------------------------------------------|
|       |                    |       |                             |             |              |                              |                                                                   | <i>Development of research question</i> | <i>Selecting outcome</i> | <i>Other activities</i> | <i>Dissemination and Implementation of results</i> |                                                                                                                                                                                                              |
|       |                    |       |                             |             |              |                              |                                                                   |                                         |                          |                         |                                                    | s' capacity to engage in research and deliver community-based interventions, it was collectively decided that all the interventions would be delivered, and all data maintained, by community-peer educators |

**ADDITIONAL FILE 2**

**Table 2. Full study characteristics of included studies.**

† Denotes where excerpts are taken verbatim from study.

| Study | Country of conduct | Title | Multi-centre/<br>single centre | Sample Size | Field/Topic | Ethnic/Minority populations | Number of patients/community representatives engaged in research | Methods of Engagement†           |                   |                  |                                                                                                                             |
|-------|--------------------|-------|--------------------------------|-------------|-------------|-----------------------------|------------------------------------------------------------------|----------------------------------|-------------------|------------------|-----------------------------------------------------------------------------------------------------------------------------|
|       |                    |       |                                |             |             |                             |                                                                  | Development of research question | Selecting outcome | Other activities | Dissemination and Implementation of results                                                                                 |
|       |                    |       |                                |             |             |                             |                                                                  |                                  |                   |                  | and staff from each of the 5 community sites"                                                                               |
|       |                    |       |                                |             |             |                             |                                                                  |                                  |                   |                  | "In this CBPR partnership, the community partners were completely and equally (e.g., individual budget management) involved |

**ADDITIONAL FILE 2**

**Table 2. Full study characteristics of included studies.**

† Denotes where excerpts are taken verbatim from study.

| Study | Country of conduct | Title | Multi-centre/singl e centre | Sample Size | Field/ Topic | Ethnic/ Minority populations | Number of patients/ community representatives engaged in research | Methods of Engagement†                  |                          |                         |                                                                                                                                                                                                |
|-------|--------------------|-------|-----------------------------|-------------|--------------|------------------------------|-------------------------------------------------------------------|-----------------------------------------|--------------------------|-------------------------|------------------------------------------------------------------------------------------------------------------------------------------------------------------------------------------------|
|       |                    |       |                             |             |              |                              |                                                                   | <i>Development of research question</i> | <i>Selecting outcome</i> | <i>Other activities</i> | <i>Dissemination and Implementation of results</i>                                                                                                                                             |
|       |                    |       |                             |             |              |                              |                                                                   |                                         |                          |                         | in all aspects of the research project, which a paucity of projects is able to do in practice. As shared earlier, the community partners identified the research topic and provided input into |

**ADDITIONAL FILE 2**

**Table 2. Full study characteristics of included studies.**

† Denotes where excerpts are taken verbatim from study.

| Study | Country of conduct | Title | Multi-centre/<br>single centre | Sample Size | Field/Topic | Ethnic/Minority populations | Number of patients/ community representatives engaged in research | Methods of Engagement†           |                   |                  |                                                                                                                                                                                 |
|-------|--------------------|-------|--------------------------------|-------------|-------------|-----------------------------|-------------------------------------------------------------------|----------------------------------|-------------------|------------------|---------------------------------------------------------------------------------------------------------------------------------------------------------------------------------|
|       |                    |       |                                |             |             |                             |                                                                   | Development of research question | Selecting outcome | Other activities | Dissemination and Implementation of results                                                                                                                                     |
|       |                    |       |                                |             |             |                             |                                                                   |                                  |                   |                  | how the CBPR partnership would be structured and how the study would be designed and implemented. They also own their own data and determine how the information is disseminate |

ADDITIONAL FILE 2

Table 2. Full study characteristics of included studies.

† Denotes where excerpts are taken verbatim from study.

| Study | Country of conduct | Title | Multi-centre/<br>single centre | Sample Size | Field/ Topic | Ethnic/<br>Minority populations | Number of patients/<br>community<br>representatives engaged in research | Methods of Engagement <sup>†</sup>                                                                                                                                                         |                          |                         |                                                    |
|-------|--------------------|-------|--------------------------------|-------------|--------------|---------------------------------|-------------------------------------------------------------------------|--------------------------------------------------------------------------------------------------------------------------------------------------------------------------------------------|--------------------------|-------------------------|----------------------------------------------------|
|       |                    |       |                                |             |              |                                 |                                                                         | <i>Development of research question</i>                                                                                                                                                    | <i>Selecting outcome</i> | <i>Other activities</i> | <i>Dissemination and Implementation of results</i> |
|       |                    |       |                                |             |              |                                 |                                                                         | d in their respective communities. The active involvement of communities for which the research findings are to benefit is vital to developing effective and sustainable community engaged |                          |                         |                                                    |

**ADDITIONAL FILE 2**

**Table 2. Full study characteristics of included studies.**

† Denotes where excerpts are taken verbatim from study.

| Study                     | Country of conduct | Title                                                                                                                       | Multi-centre/<br>single centre | Sample Size | Field/Topic   | Ethnic/<br>Minority populations | Number of patients/<br>community representatives engaged in research | Methods of Engagement <sup>†</sup> |                   |                                                                                                                                                  |                                             |
|---------------------------|--------------------|-----------------------------------------------------------------------------------------------------------------------------|--------------------------------|-------------|---------------|---------------------------------|----------------------------------------------------------------------|------------------------------------|-------------------|--------------------------------------------------------------------------------------------------------------------------------------------------|---------------------------------------------|
|                           |                    |                                                                                                                             |                                |             |               |                                 |                                                                      | Development of research question   | Selection outcome | Other activities                                                                                                                                 | Dissemination and Implementation of results |
|                           |                    |                                                                                                                             |                                |             |               |                                 |                                                                      |                                    |                   | interventions to eliminate health disparities."                                                                                                  |                                             |
| Cunningham, S., 2015 [34] | UK                 | Bronchiolitis of Infancy Discharge Study<br><br>(BIDS): a multicentre, parallel-group, double-blind, randomised controlled, | Multiple sites                 | 615         | Bronchiolitis | Not reported                    | Not reported                                                         | Not reported                       | Not reported      | In the study set-up stages we engaged with a parent representative to guide protocol development. Unfortunately, that link was lost early in the | Not reported                                |

ADDITIONAL FILE 2

Table 2. Full study characteristics of included studies.

† Denotes where excerpts are taken verbatim from study.

| Study | Country of conduct | Title                                      | Multi-centre/<br>single centre | Sample Size | Field/ Topic | Ethnic/ Minority populations | Number of patients/ community representatives engaged in research | Methods of Engagement <sup>†</sup>      |                          |                         |                                                    |                                                                                                                                                                                                   |
|-------|--------------------|--------------------------------------------|--------------------------------|-------------|--------------|------------------------------|-------------------------------------------------------------------|-----------------------------------------|--------------------------|-------------------------|----------------------------------------------------|---------------------------------------------------------------------------------------------------------------------------------------------------------------------------------------------------|
|       |                    |                                            |                                |             |              |                              |                                                                   | <i>Development of research question</i> | <i>Selecting outcome</i> | <i>Other activities</i> | <i>Dissemination and Implementation of results</i> |                                                                                                                                                                                                   |
|       |                    | equivalence trial with economic evaluation |                                |             |              |                              |                                                                   |                                         |                          |                         |                                                    | study and we were unable to engage appropriate patient and public involvement , possibly as acute bronchiolitis is a relatively short-duration illness for many and is often not given a labelled |

**ADDITIONAL FILE 2**

**Table 2. Full study characteristics of included studies.**

† Denotes where excerpts are taken verbatim from study.

| Study | Country of conduct | Title | Multi-centre/<br>single centre | Sample Size | Field/Topic | Ethnic/Minority populations | Number of patients/ community representatives engaged in research | Methods of Engagement <sup>†</sup>      |                          |                         |                                                    |                                                                                                                                                                                                            |
|-------|--------------------|-------|--------------------------------|-------------|-------------|-----------------------------|-------------------------------------------------------------------|-----------------------------------------|--------------------------|-------------------------|----------------------------------------------------|------------------------------------------------------------------------------------------------------------------------------------------------------------------------------------------------------------|
|       |                    |       |                                |             |             |                             |                                                                   | <i>Development of research question</i> | <i>Selecting outcome</i> | <i>Other activities</i> | <i>Dissemination and Implementation of results</i> |                                                                                                                                                                                                            |
|       |                    |       |                                |             |             |                             |                                                                   |                                         |                          |                         |                                                    | diagnosis in primary care. In our prestudy feasibility assessment , we were fortunate to be able to meet the parents of children during an admission to hospital with acute bronchiolitis , to gauge their |



**ADDITIONAL FILE 2**

**Table 2. Full study characteristics of included studies.**

† Denotes where excerpts are taken verbatim from study.

| Study | Country of conduct | Title | Multi-centre/<br>single centre | Sample Size | Field/Topic | Ethnic/Minority populations | Number of patients/communities<br>y<br>representatives engaged in research | Methods of Engagement <sup>†</sup> |                   |                  |                                             |                                                                                                                                                                                                 |
|-------|--------------------|-------|--------------------------------|-------------|-------------|-----------------------------|----------------------------------------------------------------------------|------------------------------------|-------------------|------------------|---------------------------------------------|-------------------------------------------------------------------------------------------------------------------------------------------------------------------------------------------------|
|       |                    |       |                                |             |             |                             |                                                                            | Development of research question   | Selecting outcome | Other activities | Dissemination and implementation of results |                                                                                                                                                                                                 |
|       |                    |       |                                |             |             |                             |                                                                            |                                    |                   |                  |                                             | perspective on our proposed trial at a similar time point as that in which we would be engaging with parents of children enrolled to the study. Parents were more positive than we had expected |

**ADDITIONAL FILE 2**

**Table 2. Full study characteristics of included studies.**

† Denotes where excerpts are taken verbatim from study.

| Study | Country of conduct | Title | Multi-centre/singleton centre | Sample Size | Field/ Topic | Ethnic/ Minority populations | Number of patients/ community representatives engaged in research | Methods of Engagement†                  |                          |                         |                                                                                                                                                                                      |
|-------|--------------------|-------|-------------------------------|-------------|--------------|------------------------------|-------------------------------------------------------------------|-----------------------------------------|--------------------------|-------------------------|--------------------------------------------------------------------------------------------------------------------------------------------------------------------------------------|
|       |                    |       |                               |             |              |                              |                                                                   | <i>Development of research question</i> | <i>Selecting outcome</i> | <i>Other activities</i> | <i>Dissemination and Implementation of results</i>                                                                                                                                   |
|       |                    |       |                               |             |              |                              |                                                                   |                                         |                          |                         | and the discussions gave valuable guidance for study exclusions, parent information sheets and appropriate use of language when conveying potential risks and benefits of the study. |

**ADDITIONAL FILE 2**

**Table 2. Full study characteristics of included studies.**

† Denotes where excerpts are taken verbatim from study.

| Study                   | Country of conduct | Title                                                                          | Multi-centre/<br>single centre | Sample Size | Field/Topic  | Ethnic/Minority populations | Number of patients/communities<br>representatives engaged in research | Methods of Engagement <sup>†</sup>      |                          |                                                                                                                                                                              |                                                    |
|-------------------------|--------------------|--------------------------------------------------------------------------------|--------------------------------|-------------|--------------|-----------------------------|-----------------------------------------------------------------------|-----------------------------------------|--------------------------|------------------------------------------------------------------------------------------------------------------------------------------------------------------------------|----------------------------------------------------|
|                         |                    |                                                                                |                                |             |              |                             |                                                                       | <i>Development of research question</i> | <i>Selecting outcome</i> | <i>Other activities</i>                                                                                                                                                      | <i>Dissemination and Implementation of results</i> |
| Zgibor, J.C., 2016 [38] | USA                | Partnership Building and Implementation of an Integrated Healthy-Aging Program | Multiple sites                 | 462         | Health aging | Blacks, other               | NR                                                                    | Not reported                            | Not reported             | Both the AF and CAPH-PRC recruited instructors, integrated the content of the programs, and shared training costs. The CAPH-PRC was responsible for new site and participant | Not reported                                       |

**ADDITIONAL FILE 2**

**Table 2. Full study characteristics of included studies.**

† Denotes where excerpts are taken verbatim from study.

| Study | Country of conduct | Title | Multi-centre/singl e centre | Sample Size | Field/ Topic | Ethnic/ Minority populations | Number of patients/ community representatives engaged in research | Methods of Engagement†                  |                          |                         |                                                    |                                                                                                                                                                          |
|-------|--------------------|-------|-----------------------------|-------------|--------------|------------------------------|-------------------------------------------------------------------|-----------------------------------------|--------------------------|-------------------------|----------------------------------------------------|--------------------------------------------------------------------------------------------------------------------------------------------------------------------------|
|       |                    |       |                             |             |              |                              |                                                                   | <i>Development of research question</i> | <i>Selecting outcome</i> | <i>Other activities</i> | <i>Dissemination and Implementation of results</i> |                                                                                                                                                                          |
|       |                    |       |                             |             |              |                              |                                                                   |                                         |                          |                         |                                                    | recruitment and research-related tasks including data collection, data entry, and analysis, and the AF was responsible for facilitating engagement of existing sites and |

**ADDITIONAL FILE 2**

**Table 2. Full study characteristics of included studies.**

† Denotes where excerpts are taken verbatim from study.

| Study | Country of conduct | Title | Multi-centre/<br>single centre | Sample Size | Field/Topic | Ethnic/<br>Minority populations | Number of patients/<br>community representatives engaged in research | Methods of Engagement <sup>†</sup>      |                          |                         |                                                                                                                                                          |
|-------|--------------------|-------|--------------------------------|-------------|-------------|---------------------------------|----------------------------------------------------------------------|-----------------------------------------|--------------------------|-------------------------|----------------------------------------------------------------------------------------------------------------------------------------------------------|
|       |                    |       |                                |             |             |                                 |                                                                      | <i>Development of research question</i> | <i>Selecting outcome</i> | <i>Other activities</i> | <i>Dissemination and Implementation of results</i>                                                                                                       |
|       |                    |       |                                |             |             |                                 |                                                                      |                                         |                          |                         | training new instructors.                                                                                                                                |
|       |                    |       |                                |             |             |                                 |                                                                      |                                         |                          |                         | A Research Advisory Board was formed consisting of two representatives from the AF and three representatives from CAPH-PRC. Bi-weekly meetings were held |

**ADDITIONAL FILE 2**

**Table 2. Full study characteristics of included studies.**

† Denotes where excerpts are taken verbatim from study.

| Study | Country of conduct | Title | Multi-centre/ single centre | Sample Size | Field/ Topic | Ethnic/ Minority populations | Number of patients/ community representatives engaged in research | Methods of Engagement <sup>†</sup> |                   |                  |                                             |                                                                                                                                                                                  |
|-------|--------------------|-------|-----------------------------|-------------|--------------|------------------------------|-------------------------------------------------------------------|------------------------------------|-------------------|------------------|---------------------------------------------|----------------------------------------------------------------------------------------------------------------------------------------------------------------------------------|
|       |                    |       |                             |             |              |                              |                                                                   | Development of research question   | Selecting outcome | Other activities | Dissemination and Implementation of results |                                                                                                                                                                                  |
|       |                    |       |                             |             |              |                              |                                                                   |                                    |                   |                  |                                             | with additional contact made as needed in order to address any program challenges. Although the study design and selection of measures was driven by the researchers, the AF had |

**ADDITIONAL FILE 2**

**Table 2. Full study characteristics of included studies.**

† Denotes where excerpts are taken verbatim from study.

| Study | Country of conduct | Title | Multi-centre/<br>single centre | Sample Size | Field/Topic | Ethnic/<br>Minority populations | Number of patients/<br>community representatives engaged in research | Methods of Engagement†           |                   |                  |                                             |                                                                                                                                                                                                  |
|-------|--------------------|-------|--------------------------------|-------------|-------------|---------------------------------|----------------------------------------------------------------------|----------------------------------|-------------------|------------------|---------------------------------------------|--------------------------------------------------------------------------------------------------------------------------------------------------------------------------------------------------|
|       |                    |       |                                |             |             |                                 |                                                                      | Development of research question | Selecting outcome | Other activities | Dissemination and Implementation of results |                                                                                                                                                                                                  |
|       |                    |       |                                |             |             |                                 |                                                                      |                                  |                   |                  |                                             | considerable input into training and implementation. The CAPH-PRC provided all recruitment materials, instructor manuals, participant materials, training on human subject research, and a small |

**ADDITIONAL FILE 2**

**Table 2. Full study characteristics of included studies.**

† Denotes where excerpts are taken verbatim from study.

| Study                | Country of conduct | Title                                                                              | Multi-centre/<br>single centre | Sample Size                                    | Field/Topic              | Ethnic/Minority populations | Number of patients/ community representatives engaged in research | Methods of Engagement <sup>†</sup> |                   |                                                                                                                          |                                             |
|----------------------|--------------------|------------------------------------------------------------------------------------|--------------------------------|------------------------------------------------|--------------------------|-----------------------------|-------------------------------------------------------------------|------------------------------------|-------------------|--------------------------------------------------------------------------------------------------------------------------|---------------------------------------------|
|                      |                    |                                                                                    |                                |                                                |                          |                             |                                                                   | Development of research question   | Selecting outcome | Other activities                                                                                                         | Dissemination and Implementation of results |
|                      |                    |                                                                                    |                                |                                                |                          |                             |                                                                   |                                    |                   | stipend for instructors.<br>A representative from the AF also sat on the Data Safety Monitoring Committee for the study. |                                             |
| Man, M.S., 2015 [25] | UK                 | Improving recruitment to a study of telehealth management for long-term conditions | Multiple sites                 | 2 trials embedded in study: Healthlines CVD (n | Patient information aids | Not reported                | 2                                                                 | Not reported                       | Not reported      | Study does not state how patients were engaged. However                                                                  | Not reported                                |



**ADDITIONAL FILE 2**

**Table 2. Full study characteristics of included studies.**

† Denotes where excerpts are taken verbatim from study.

| Study | Country of conduct | Title                                                                                                  | Multi-centre/<br>single centre | Sample Size                               | Field/Topic | Ethnic/Minority populations | Number of patients/ community representatives engaged in research | Methods of Engagement <sup>†</sup> |                   |                  |                                                                                                                                                            |
|-------|--------------------|--------------------------------------------------------------------------------------------------------|--------------------------------|-------------------------------------------|-------------|-----------------------------|-------------------------------------------------------------------|------------------------------------|-------------------|------------------|------------------------------------------------------------------------------------------------------------------------------------------------------------|
|       |                    |                                                                                                        |                                |                                           |             |                             |                                                                   | Development of research question   | Selecting outcome | Other activities | Dissemination and Implementation of results                                                                                                                |
|       |                    | in primary care: two embedded, randomised controlled trials of optimised patient information materials |                                | = 671); Healthlines Depression (n = 1364) |             |                             |                                                                   |                                    |                   |                  | they do state "Judith Hogg and Ailsa Donnelly from PRIMER (the Primary Care Research in Manchester Engagement Resource) who contributed patient and public |

**ADDITIONAL FILE 2**

**Table 2. Full study characteristics of included studies.**

† Denotes where excerpts are taken verbatim from study.

| Study | Country of conduct | Title | Multi-centre/<br>single centre | Sample Size | Field/Topic | Ethnic/Minority populations | Number of patients/ community representatives engaged in research | Methods of Engagement <sup>†</sup> |                   |                  |                                                                           |                                                                              |
|-------|--------------------|-------|--------------------------------|-------------|-------------|-----------------------------|-------------------------------------------------------------------|------------------------------------|-------------------|------------------|---------------------------------------------------------------------------|------------------------------------------------------------------------------|
|       |                    |       |                                |             |             |                             |                                                                   | Development of research question   | Selection outcome | Other activities | Dissemination and Implementation of results                               |                                                                              |
|       |                    |       |                                |             |             |                             |                                                                   |                                    |                   |                  | involvement to the work of the MRC-START Study team" (In acknowledgments) | Developing the recruitment intervention : "In MRC-START, a process involving |

**ADDITIONAL FILE 2**

**Table 2. Full study characteristics of included studies.**

† Denotes where excerpts are taken verbatim from study.

| Study | Country of conduct | Title | Multi-centre/<br>single centre | Sample Size | Field/Topic | Ethnic/Minority populations | Number of patients/community representatives engaged in research | Methods of Engagement <sup>†</sup>      |                          |                         |                                                                                                                                                                                                          |
|-------|--------------------|-------|--------------------------------|-------------|-------------|-----------------------------|------------------------------------------------------------------|-----------------------------------------|--------------------------|-------------------------|----------------------------------------------------------------------------------------------------------------------------------------------------------------------------------------------------------|
|       |                    |       |                                |             |             |                             |                                                                  | <i>Development of research question</i> | <i>Selecting outcome</i> | <i>Other activities</i> | <i>Dissemination and Implementation of results</i>                                                                                                                                                       |
|       |                    |       |                                |             |             |                             |                                                                  |                                         |                          |                         | consumer feedback, expertise in writing for patients and graphic design is used to produce an optimised version of the patient information materials (patient information sheet and covering letter) for |

**ADDITIONAL FILE 2**

**Table 2. Full study characteristics of included studies.**

† Denotes where excerpts are taken verbatim from study.

| Study                         | Country of conduct | Title                                                                                                                                 | Multi-centre/ single centre | Sample Size | Field/ Topic                 | Ethnic/ Minority populations                                                                                                                        | Number of patients/ community representatives engaged in research                                                                    | Methods of Engagement <sup>†</sup> |                   |                                                                                                                                                       |                                             |
|-------------------------------|--------------------|---------------------------------------------------------------------------------------------------------------------------------------|-----------------------------|-------------|------------------------------|-----------------------------------------------------------------------------------------------------------------------------------------------------|--------------------------------------------------------------------------------------------------------------------------------------|------------------------------------|-------------------|-------------------------------------------------------------------------------------------------------------------------------------------------------|---------------------------------------------|
|                               |                    |                                                                                                                                       |                             |             |                              |                                                                                                                                                     |                                                                                                                                      | Development of research question   | Selection outcome | Other activities                                                                                                                                      | Dissemination and Implementation of results |
|                               |                    |                                                                                                                                       |                             |             |                              |                                                                                                                                                     |                                                                                                                                      |                                    |                   | each host trial"                                                                                                                                      |                                             |
| Bauermeister, J.A., 2015 [30] | USA                | Acceptability and Preliminary Efficacy of a Tailored Online HIV/STI Testing Intervention for Young Men who have Sex with Men: The Get | Multiple sites              | 130         | HIV/STI Testing Intervention | The CAB (community advisory board) were also diverse with regards to race/ethnicity (three Whites, two Latinos, and two African American). The YAB: | The community advisory board includes consisted of seven community organization. The youth advisory board consisted of eight members | Not reported                       | Not reported      | "We thank our CAB and YAB for their contributions during the development and implementation of the intervention . "All study procedures were approved | Not reported                                |

**ADDITIONAL FILE 2**

**Table 2. Full study characteristics of included studies.**

† Denotes where excerpts are taken verbatim from study.

| Study | Country of conduct | Title              | Multi-centre/<br>single centre | Sample Size | Field/Topic | Ethnic/Minority populations                                                                         | Number of patients/ community representatives engaged in research | Methods of Engagement <sup>†</sup> |                                                                   |                  |                                             |                                                                                      |
|-------|--------------------|--------------------|--------------------------------|-------------|-------------|-----------------------------------------------------------------------------------------------------|-------------------------------------------------------------------|------------------------------------|-------------------------------------------------------------------|------------------|---------------------------------------------|--------------------------------------------------------------------------------------|
|       |                    |                    |                                |             |             |                                                                                                     |                                                                   | Development of research question   | Selection outcome                                                 | Other activities | Dissemination and Implementation of results |                                                                                      |
|       |                    | Connected! Program |                                |             |             | four African American, two White, one Middle Eastern, and one Mixed Race (African American/ White). |                                                                   |                                    | by Community Advisory Board (CAB) and Youth Advisory Board (YAB). |                  |                                             | The CAB met with the Get Connected! research team four times, providing constructive |

**ADDITIONAL FILE 2**

**Table 2. Full study characteristics of included studies.**

† Denotes where excerpts are taken verbatim from study.

| Study | Country of conduct | Title | Multi-centre/singl e centre | Sample Size | Field/ Topic | Ethnic/ Minority populations | Number of patients/ community representatives engaged in research | Methods of Engagement†            |                    |                  |                                                                                                                                                                                  |
|-------|--------------------|-------|-----------------------------|-------------|--------------|------------------------------|-------------------------------------------------------------------|-----------------------------------|--------------------|------------------|----------------------------------------------------------------------------------------------------------------------------------------------------------------------------------|
|       |                    |       |                             |             |              |                              |                                                                   | Develop ment of research question | Selec ting outcome | Other activities | Dissemin ation and Implemen tation of results                                                                                                                                    |
|       |                    |       |                             |             |              |                              |                                                                   |                                   |                    |                  | feedback on most aspects of the study's progression , including the developme nt of the provider checklist, which was used to evaluate the HIV/STI testing sites, and the online |

**ADDITIONAL FILE 2**

**Table 2. Full study characteristics of included studies.**

† Denotes where excerpts are taken verbatim from study.

| Study | Country of conduct | Title | Multi-centre/<br>single centre | Sample Size | Field/Topic | Ethnic/Minority populations | Number of patients/ community representatives engaged in research | Methods of Engagement <sup>†</sup> |                   |                  |                                                                                                                                                           |
|-------|--------------------|-------|--------------------------------|-------------|-------------|-----------------------------|-------------------------------------------------------------------|------------------------------------|-------------------|------------------|-----------------------------------------------------------------------------------------------------------------------------------------------------------|
|       |                    |       |                                |             |             |                             |                                                                   | Development of research question   | Selecting outcome | Other activities | Dissemination and Implementation of results                                                                                                               |
|       |                    |       |                                |             |             |                             |                                                                   |                                    |                   |                  | tailored website.                                                                                                                                         |
|       |                    |       |                                |             |             |                             |                                                                   |                                    |                   |                  | They were invaluable in helping to assemble critical questions for study participants to ask providers upon getting tested as well as developing the “STI |

**ADDITIONAL FILE 2**

**Table 2. Full study characteristics of included studies.**

† Denotes where excerpts are taken verbatim from study.

| Study | Country of conduct | Title | Multi-centre/<br>single centre | Sample Size | Field/ Topic | Ethnic/ Minority populations | Number of patients/ community representatives engaged in research | Methods of Engagement <sup>†</sup> |                   |                  |                                             |                                                                                                                                    |
|-------|--------------------|-------|--------------------------------|-------------|--------------|------------------------------|-------------------------------------------------------------------|------------------------------------|-------------------|------------------|---------------------------------------------|------------------------------------------------------------------------------------------------------------------------------------|
|       |                    |       |                                |             |              |                              |                                                                   | Development of research question   | Selection outcome | Other activities | Dissemination and Implementation of results |                                                                                                                                    |
|       |                    |       |                                |             |              |                              |                                                                   |                                    |                   |                  |                                             | facts” portion of the website.                                                                                                     |
|       |                    |       |                                |             |              |                              |                                                                   |                                    |                   |                  |                                             | The YAB met with the Get Connected! research team six times throughout the study, providing critical feedback at each stage of the |



**ADDITIONAL FILE 2**

**Table 2. Full study characteristics of included studies.**

† Denotes where excerpts are taken verbatim from study.

| Study | Country of conduct | Title | Multi-centre/<br>single centre | Sample Size | Field/Topic | Ethnic/Minority populations | Number of patients/community representatives engaged in research | Methods of Engagement <sup>†</sup>      |                          |                         |                                                    |                                                                                                                                                                                   |
|-------|--------------------|-------|--------------------------------|-------------|-------------|-----------------------------|------------------------------------------------------------------|-----------------------------------------|--------------------------|-------------------------|----------------------------------------------------|-----------------------------------------------------------------------------------------------------------------------------------------------------------------------------------|
|       |                    |       |                                |             |             |                             |                                                                  | <i>Development of research question</i> | <i>Selecting outcome</i> | <i>Other activities</i> | <i>Dissemination and Implementation of results</i> |                                                                                                                                                                                   |
|       |                    |       |                                |             |             |                             |                                                                  |                                         |                          |                         |                                                    | project. As members of the study's target population, their insights were crucial to the success of the study. In collaboration with a graphic designer, the YAB members designed |

**ADDITIONAL FILE 2**

**Table 2. Full study characteristics of included studies.**

† Denotes where excerpts are taken verbatim from study.

| Study | Country of conduct | Title | Multi-centre/<br>single centre | Sample Size | Field/Topic | Ethnic/Minority populations | Number of patients/ community representatives engaged in research | Methods of Engagement <sup>†</sup> |                   |                  |                                             |  |  |  |  |                                                                                                                                                                                        |
|-------|--------------------|-------|--------------------------------|-------------|-------------|-----------------------------|-------------------------------------------------------------------|------------------------------------|-------------------|------------------|---------------------------------------------|--|--|--|--|----------------------------------------------------------------------------------------------------------------------------------------------------------------------------------------|
|       |                    |       |                                |             |             |                             |                                                                   | Development of research question   | Selecting outcome | Other activities | Dissemination and Implementation of results |  |  |  |  |                                                                                                                                                                                        |
|       |                    |       |                                |             |             |                             |                                                                   |                                    |                   |                  |                                             |  |  |  |  | the logo and recruitment materials (e.g., palm cards) for Get Connected! They critiqued each iteration of the website design and gave extensive feedback on both the content presented |

**ADDITIONAL FILE 2**

**Table 2. Full study characteristics of included studies.**

† Denotes where excerpts are taken verbatim from study.

| Study | Country of conduct | Title | Multi-centre/<br>single centre | Sample Size | Field/Topic | Ethnic/<br>Minority populations | Number of patients/<br>community representatives engaged in research | Methods of Engagement <sup>†</sup>      |                          |                         |                                                                                                                                   |                                     |
|-------|--------------------|-------|--------------------------------|-------------|-------------|---------------------------------|----------------------------------------------------------------------|-----------------------------------------|--------------------------|-------------------------|-----------------------------------------------------------------------------------------------------------------------------------|-------------------------------------|
|       |                    |       |                                |             |             |                                 |                                                                      | <i>Development of research question</i> | <i>Selecting outcome</i> | <i>Other activities</i> | <i>Dissemination and Implementation of results</i>                                                                                |                                     |
|       |                    |       |                                |             |             |                                 |                                                                      |                                         |                          |                         | on each page of the site and the language used in the survey items. YAB members also assisted with study participant recruitment. |                                     |
|       |                    |       |                                |             |             |                                 |                                                                      |                                         |                          |                         |                                                                                                                                   | As the content for the intervention |

**ADDITIONAL FILE 2**

**Table 2. Full study characteristics of included studies.**

† Denotes where excerpts are taken verbatim from study.

| Study | Country of conduct | Title | Multi-centre/<br>single centre | Sample Size | Field/Topic | Ethnic/Minority populations | Number of patients/community representatives engaged in research | Methods of Engagement <sup>†</sup> |                   |                  |                                             |  |                                                                                                                                                                                   |
|-------|--------------------|-------|--------------------------------|-------------|-------------|-----------------------------|------------------------------------------------------------------|------------------------------------|-------------------|------------------|---------------------------------------------|--|-----------------------------------------------------------------------------------------------------------------------------------------------------------------------------------|
|       |                    |       |                                |             |             |                             |                                                                  | Development of research question   | Selecting outcome | Other activities | Dissemination and Implementation of results |  |                                                                                                                                                                                   |
|       |                    |       |                                |             |             |                             |                                                                  |                                    |                   |                  |                                             |  | and control conditions (including imagery and messaging) was developed, focus groups consisting of YAB and CAB members evaluated this content for its acceptability and relevance |

**ADDITIONAL FILE 2**

**Table 2. Full study characteristics of included studies.**

† Denotes where excerpts are taken verbatim from study.

| Study                         | Country of conduct | Title                                                                                              | Multi-centre/ single centre | Sample Size | Field/ Topic                    | Ethnic/ Minority populations | Number of patients/ community representatives engaged in research | Methods of Engagement†           |                                                              |                                                                                           |                                             |                                       |
|-------------------------------|--------------------|----------------------------------------------------------------------------------------------------|-----------------------------|-------------|---------------------------------|------------------------------|-------------------------------------------------------------------|----------------------------------|--------------------------------------------------------------|-------------------------------------------------------------------------------------------|---------------------------------------------|---------------------------------------|
|                               |                    |                                                                                                    |                             |             |                                 |                              |                                                                   | Development of research question | Selection outcome                                            | Other activities                                                                          | Dissemination and Implementation of results |                                       |
|                               |                    |                                                                                                    |                             |             |                                 |                              |                                                                   | to the target population.        |                                                              |                                                                                           |                                             |                                       |
| Huppelshoven, A, G. 2015 [39] | Netherlands        | Improving patient-centredness in partnership with female patients: a cluster RCT in fertility care | Multiple sites              | 730         | Patient-centered fertility care | Not reported                 | Not reported                                                      | Not reported                     | audit and feedback procedure and in the outcome measurements | "The Dutch Patient Association 'Freya' was involved in the design of the intervention . " | Not reported                                | "This randomized study on the improve |



**ADDITIONAL FILE 2**

**Table 2. Full study characteristics of included studies.**

† Denotes where excerpts are taken verbatim from study.

| Study | Country of conduct | Title | Multi-centre/<br>single centre | Sample Size | Field/Topic | Ethnic/<br>Minority populations | Number of patients/<br>community representatives engaged in research | Methods of Engagement <sup>†</sup>      |                          |                         |                                                                                                                                                                                                       |
|-------|--------------------|-------|--------------------------------|-------------|-------------|---------------------------------|----------------------------------------------------------------------|-----------------------------------------|--------------------------|-------------------------|-------------------------------------------------------------------------------------------------------------------------------------------------------------------------------------------------------|
|       |                    |       |                                |             |             |                                 |                                                                      | <i>Development of research question</i> | <i>Selecting outcome</i> | <i>Other activities</i> | <i>Dissemination and Implementation of results</i>                                                                                                                                                    |
|       |                    |       |                                |             |             |                                 |                                                                      |                                         |                          |                         | audit and feedback procedure and in the outcome measurements. Moreover, patients played an important role in the execution of the intervention, as former patients of the participating clinics (i.e. |

**ADDITIONAL FILE 2**

**Table 2. Full study characteristics of included studies.**

† Denotes where excerpts are taken verbatim from study.

| Study                 | Country of conduct | Title                                                                                      | Multi-centre/<br>single centre | Sample Size | Field/Topic  | Ethnic/Minority populations | Number of patients/community representatives engaged in research | Methods of Engagement <sup>†</sup> |                   |                                                                                   |                                             |
|-----------------------|--------------------|--------------------------------------------------------------------------------------------|--------------------------------|-------------|--------------|-----------------------------|------------------------------------------------------------------|------------------------------------|-------------------|-----------------------------------------------------------------------------------|---------------------------------------------|
|                       |                    |                                                                                            |                                |             |              |                             |                                                                  | Development of research question   | Selection outcome | Other activities                                                                  | Dissemination and Implementation of results |
|                       |                    |                                                                                            |                                |             |              |                             |                                                                  |                                    |                   | both male and female patients) took part in the EOVs as consultants of the team." |                                             |
| Tully, M., 2015, [26] | USA                | Implementation of an Adjunct Strategy to Reduce Blood Pressure in Blacks with Uncontrolled | Multiple sites                 | 83          | Hypertension | African-Americans           | Not reported                                                     | Not reported                       | Not reported      | "The community health worker (CHW) then contacted the patients again              | Not reported                                |



ADDITIONAL FILE 2

Table 2. Full study characteristics of included studies.

† Denotes where excerpts are taken verbatim from study.

| Study | Country of conduct | Title                         | Multi-centre/ single centre | Sample Size | Field/ Topic | Ethnic/ Minority populations | Number of patients/ community representatives engaged in research | Methods of Engagement <sup>†</sup> |                   |                  |                                                                                                                                                                              |  |                   |
|-------|--------------------|-------------------------------|-----------------------------|-------------|--------------|------------------------------|-------------------------------------------------------------------|------------------------------------|-------------------|------------------|------------------------------------------------------------------------------------------------------------------------------------------------------------------------------|--|-------------------|
|       |                    |                               |                             |             |              |                              |                                                                   | Development of research question   | Selecting outcome | Other activities | Dissemination and Implementation of results                                                                                                                                  |  |                   |
|       |                    | Hypertension: a Pilot Project |                             |             |              |                              |                                                                   |                                    |                   |                  | to field questions about study participation and offer convenient meeting times. She followed up with reminder calls, sent bus tickets and remained available for questions. |  | "The CHW, a black |

**ADDITIONAL FILE 2**

**Table 2. Full study characteristics of included studies.**

† Denotes where excerpts are taken verbatim from study.

| Study | Country of conduct | Title | Multi-centre/ single centre | Sample Size | Field/ Topic | Ethnic/ Minority populations | Number of patients/ community representatives engaged in research | Methods of Engagement <sup>†</sup>      |                          |                         |                                                    |                                                                                                                                                                                                               |
|-------|--------------------|-------|-----------------------------|-------------|--------------|------------------------------|-------------------------------------------------------------------|-----------------------------------------|--------------------------|-------------------------|----------------------------------------------------|---------------------------------------------------------------------------------------------------------------------------------------------------------------------------------------------------------------|
|       |                    |       |                             |             |              |                              |                                                                   | <i>Development of research question</i> | <i>Selecting outcome</i> | <i>Other activities</i> | <i>Dissemination and Implementation of results</i> |                                                                                                                                                                                                               |
|       |                    |       |                             |             |              |                              |                                                                   |                                         |                          |                         |                                                    | <p>woman, functioned as a lay leader for the intervention . This was a full time position with fringe benefits. She had no other responsibilities. The individual in this position did not have a college</p> |

**ADDITIONAL FILE 2**

**Table 2. Full study characteristics of included studies.**

† Denotes where excerpts are taken verbatim from study.

| Study | Country of conduct | Title | Multi-centre/<br>single centre | Sample Size | Field/Topic | Ethnic/Minority populations | Number of patients/community representatives engaged in research | Methods of Engagement <sup>†</sup>      |                          |                         |                                                    |                                                                                                                                                                                    |
|-------|--------------------|-------|--------------------------------|-------------|-------------|-----------------------------|------------------------------------------------------------------|-----------------------------------------|--------------------------|-------------------------|----------------------------------------------------|------------------------------------------------------------------------------------------------------------------------------------------------------------------------------------|
|       |                    |       |                                |             |             |                             |                                                                  | <i>Development of research question</i> | <i>Selecting outcome</i> | <i>Other activities</i> | <i>Dissemination and Implementation of results</i> |                                                                                                                                                                                    |
|       |                    |       |                                |             |             |                             |                                                                  |                                         |                          |                         |                                                    | degree but had a long history in primary education before becoming an AHEC certified Community Health Worker. She was also certified through the Living Well with Chronic Diseases |

**ADDITIONAL FILE 2**

**Table 2. Full study characteristics of included studies.**

† Denotes where excerpts are taken verbatim from study.

| Study | Country of conduct | Title | Multi-centre/ single centre | Sample Size | Field/ Topic | Ethnic/ Minority populations | Number of patients/ community representatives engaged in research | Methods of Engagement <sup>†</sup> |                   |                  |                                                                                                                                                                                    |
|-------|--------------------|-------|-----------------------------|-------------|--------------|------------------------------|-------------------------------------------------------------------|------------------------------------|-------------------|------------------|------------------------------------------------------------------------------------------------------------------------------------------------------------------------------------|
|       |                    |       |                             |             |              |                              |                                                                   | Development of research question   | Selecting outcome | Other activities | Dissemination and Implementation of results                                                                                                                                        |
|       |                    |       |                             |             |              |                              |                                                                   |                                    |                   |                  | program (10). During the intervention, she reinforced individual patient action plans with weekly telephone calls to each participant. She assessed goals, reminded patients about |

**ADDITIONAL FILE 2**

**Table 2. Full study characteristics of included studies.**

† Denotes where excerpts are taken verbatim from study.

| Study | Country of conduct | Title | Multi-centre/<br>single centre | Sample Size | Field/Topic | Ethnic/<br>Minority populations | Number of patients/<br>community representatives engaged in research | Methods of Engagement <sup>†</sup>      |                          |                         |                                                    |                                                                                                                                                                                      |
|-------|--------------------|-------|--------------------------------|-------------|-------------|---------------------------------|----------------------------------------------------------------------|-----------------------------------------|--------------------------|-------------------------|----------------------------------------------------|--------------------------------------------------------------------------------------------------------------------------------------------------------------------------------------|
|       |                    |       |                                |             |             |                                 |                                                                      | <i>Development of research question</i> | <i>Selecting outcome</i> | <i>Other activities</i> | <i>Dissemination and Implementation of results</i> |                                                                                                                                                                                      |
|       |                    |       |                                |             |             |                                 |                                                                      |                                         |                          |                         |                                                    | <p>scheduled group sessions, and provided encouragement. She served as a confidant, a source of information, and facilitated communication between patients, social workers, and</p> |

**ADDITIONAL FILE 2**

**Table 2. Full study characteristics of included studies.**

† Denotes where excerpts are taken verbatim from study.

| Study | Country of conduct | Title | Multi-centre/<br>single centre | Sample Size | Field/Topic | Ethnic/<br>Minority populations | Number of patients/<br>community representatives engaged in research | Methods of Engagement <sup>†</sup>      |                          |                         |                                                                                                                                                        |
|-------|--------------------|-------|--------------------------------|-------------|-------------|---------------------------------|----------------------------------------------------------------------|-----------------------------------------|--------------------------|-------------------------|--------------------------------------------------------------------------------------------------------------------------------------------------------|
|       |                    |       |                                |             |             |                                 |                                                                      | <i>Development of research question</i> | <i>Selecting outcome</i> | <i>Other activities</i> | <i>Dissemination and Implementation of results</i>                                                                                                     |
|       |                    |       |                                |             |             |                                 |                                                                      |                                         |                          |                         | healthcare providers."                                                                                                                                 |
|       |                    |       |                                |             |             |                                 |                                                                      |                                         |                          |                         | "A Community Advisory Board was established to inform the recruitment process, to review the study's progress and barriers, and to provide guidance in |

ADDITIONAL FILE 2

Table 2. Full study characteristics of included studies.

† Denotes where excerpts are taken verbatim from study.

| Study | Country of conduct | Title | Multi-centre/<br>single centre | Sample Size | Field/Topic | Ethnic/Minority populations | Number of patients/community representatives engaged in research | Methods of Engagement <sup>†</sup>      |                          |                         |                                                                                                                                                                                  |
|-------|--------------------|-------|--------------------------------|-------------|-------------|-----------------------------|------------------------------------------------------------------|-----------------------------------------|--------------------------|-------------------------|----------------------------------------------------------------------------------------------------------------------------------------------------------------------------------|
|       |                    |       |                                |             |             |                             |                                                                  | <i>Development of research question</i> | <i>Selecting outcome</i> | <i>Other activities</i> | <i>Dissemination and Implementation of results</i>                                                                                                                               |
|       |                    |       |                                |             |             |                             |                                                                  |                                         |                          |                         | selecting and developing culturally sensitive educational materials and strategies related to health promotion and hypertension. The Board was comprised of representatives from |

**ADDITIONAL FILE 2**

**Table 2. Full study characteristics of included studies.**

† Denotes where excerpts are taken verbatim from study.

| Study | Country of conduct | Title | Multi-centre/<br>single centre | Sample Size | Field/Topic | Ethnic/Minority populations | Number of patients/community representatives engaged in research | Methods of Engagement <sup>†</sup> |                   |                  |                                             |                                                                                                                                                                                   |
|-------|--------------------|-------|--------------------------------|-------------|-------------|-----------------------------|------------------------------------------------------------------|------------------------------------|-------------------|------------------|---------------------------------------------|-----------------------------------------------------------------------------------------------------------------------------------------------------------------------------------|
|       |                    |       |                                |             |             |                             |                                                                  | Development of research question   | Selecting outcome | Other activities | Dissemination and Implementation of results |                                                                                                                                                                                   |
|       |                    |       |                                |             |             |                             |                                                                  |                                    |                   |                  |                                             | nonprofit organizations with a stake in Milwaukee's at-risk black community. Membership included one representative from each of the following: the American Heart Association, a |



**ADDITIONAL FILE 2**

**Table 2. Full study characteristics of included studies.**

† Denotes where excerpts are taken verbatim from study.

| Study | Country of conduct | Title | Multi-centre/<br>single centre | Sample Size | Field/Topic | Ethnic/Minority populations | Number of patients/community representatives engaged in research | Methods of Engagement†           |                   |                  |                                             |                                                                                                                                                                        |
|-------|--------------------|-------|--------------------------------|-------------|-------------|-----------------------------|------------------------------------------------------------------|----------------------------------|-------------------|------------------|---------------------------------------------|------------------------------------------------------------------------------------------------------------------------------------------------------------------------|
|       |                    |       |                                |             |             |                             |                                                                  | Development of research question | Selecting outcome | Other activities | Dissemination and Implementation of results |                                                                                                                                                                        |
|       |                    |       |                                |             |             |                             |                                                                  |                                  |                   |                  |                                             | neighborhood<br>Health Alliance, the Wisconsin Primary Health Care Association, and a community representative who is a locally recognized chef and who personally has |

**ADDITIONAL FILE 2**

**Table 2. Full study characteristics of included studies.**

† Denotes where excerpts are taken verbatim from study.

| Study                    | Country of conduct | Title                               | Multi-centre/<br>single centre | Sample Size | Field/Topic          | Ethnic/<br>Minority populations | Number of patients/<br>community representatives engaged in research | Methods of Engagement <sup>†</sup>      |                          |                                                                                                                                                     |                                                    |
|--------------------------|--------------------|-------------------------------------|--------------------------------|-------------|----------------------|---------------------------------|----------------------------------------------------------------------|-----------------------------------------|--------------------------|-----------------------------------------------------------------------------------------------------------------------------------------------------|----------------------------------------------------|
|                          |                    |                                     |                                |             |                      |                                 |                                                                      | <i>Development of research question</i> | <i>Selecting outcome</i> | <i>Other activities</i>                                                                                                                             | <i>Dissemination and Implementation of results</i> |
|                          |                    |                                     |                                |             |                      |                                 |                                                                      |                                         |                          | hypertension. The Board met a total of 11 times during the course of the study, more frequently in the planning phases and subsequently quarterly." |                                                    |
| Ormerod, A.D., 2015 [40] | UK                 | Comparison of the two most commonly | Multiple sites                 | 121         | Pyoderma gangrenosum | Not reported                    | Not reported                                                         | During the feasibility stage,           | During the feasibility   | Patients were involved in the design                                                                                                                | Not reported                                       |

**ADDITIONAL FILE 2**

**Table 2. Full study characteristics of included studies.**

† Denotes where excerpts are taken verbatim from study.

| Study | Country of conduct | Title                                                                                         | Multi-centre/<br>single centre | Sample Size | Field/Topic | Ethnic/Minority populations | Number of patients/communities<br>representatives engaged in research | Methods of Engagement <sup>†</sup>                                                                                                           |                                                                                                       |                                                                                                                                                                        |                                             |
|-------|--------------------|-----------------------------------------------------------------------------------------------|--------------------------------|-------------|-------------|-----------------------------|-----------------------------------------------------------------------|----------------------------------------------------------------------------------------------------------------------------------------------|-------------------------------------------------------------------------------------------------------|------------------------------------------------------------------------------------------------------------------------------------------------------------------------|---------------------------------------------|
|       |                    |                                                                                               |                                |             |             |                             |                                                                       | Development of research question                                                                                                             | Selection outcome                                                                                     | Other activities                                                                                                                                                       | Dissemination and Implementation of results |
|       |                    | used treatments for pyoderma gangrenosum: results of the STOP GAP randomised controlled trial |                                |             |             |                             |                                                                       | priority of the research question, choice of outcome measures, and methods of recruitment were informed by discussions with patients through | stage, priority of the research question, choice of outcome measures, and methods of recruitment were | and conduct of this research. During the feasibility stage, priority of the research question, choice of outcome measures, and methods of recruitment were informed by |                                             |

**ADDITIONAL FILE 2**

**Table 2. Full study characteristics of included studies.**

† Denotes where excerpts are taken verbatim from study.

| Study | Country of conduct | Title | Multi-centre/<br>single centre | Sample Size | Field/Topic | Ethnic/Minority populations | Number of patients/communities<br>representatives engaged in research | Methods of Engagement <sup>†</sup>                   |                                                                                                                                                                                                                                                          |                  |                                             |
|-------|--------------------|-------|--------------------------------|-------------|-------------|-----------------------------|-----------------------------------------------------------------------|------------------------------------------------------|----------------------------------------------------------------------------------------------------------------------------------------------------------------------------------------------------------------------------------------------------------|------------------|---------------------------------------------|
|       |                    |       |                                |             |             |                             |                                                                       | Development of research question                     | Selection outcome                                                                                                                                                                                                                                        | Other activities | Dissemination and Implementation of results |
|       |                    |       |                                |             |             |                             |                                                                       | a focus group session and two structured interviews. | informed by discussions with patients through a focus group session with patients through a focus group session and two structured interviews. During the trial, a patient joined the independent trial steering committee. Members of the UK Dermatolog |                  |                                             |



**ADDITIONAL FILE 2**

**Table 2. Full study characteristics of included studies.**

† Denotes where excerpts are taken verbatim from study.

| Study | Country of conduct | Title | Multi-centre/<br>single centre | Sample Size | Field/Topic | Ethnic/<br>Minority populations | Number of patients/<br>community representatives engaged in research | Methods of Engagement†           |                   |                  |                                                                                                                                                                                                         |
|-------|--------------------|-------|--------------------------------|-------------|-------------|---------------------------------|----------------------------------------------------------------------|----------------------------------|-------------------|------------------|---------------------------------------------------------------------------------------------------------------------------------------------------------------------------------------------------------|
|       |                    |       |                                |             |             |                                 |                                                                      | Development of research question | Selecting outcome | Other activities | Dissemination and Implementation of results                                                                                                                                                             |
|       |                    |       |                                |             |             |                                 |                                                                      |                                  |                   |                  | participants will be informed of the results through a dedicated website (www.stopgapatrial.co.uk) and will be sent details of the results in a study newsletter suitable for a non-specialist audience |

**ADDITIONAL FILE 2**

**Table 2. Full study characteristics of included studies.**

† Denotes where excerpts are taken verbatim from study.

| Study                | Country of conduct | Title                                                                                  | Multi-centre/<br>single centre | Sample Size | Field/Topic | Ethnic/Minority populations | Number of patients/communit<br>y represent<br>atives engaged in research | Methods of Engagement <sup>†</sup>                                                                                                                    |                          |                                                                                                                                                                                         |                                                                            |
|----------------------|--------------------|----------------------------------------------------------------------------------------|--------------------------------|-------------|-------------|-----------------------------|--------------------------------------------------------------------------|-------------------------------------------------------------------------------------------------------------------------------------------------------|--------------------------|-----------------------------------------------------------------------------------------------------------------------------------------------------------------------------------------|----------------------------------------------------------------------------|
|                      |                    |                                                                                        |                                |             |             |                             |                                                                          | <i>Development of research question</i>                                                                                                               | <i>Selecting outcome</i> | <i>Other activities</i>                                                                                                                                                                 | <i>Dissemination and Implementation of results</i>                         |
| Goodacre., 2015 [27] | UK                 | The PAndemic INfluenza Triage in the Emergency Department (PAINTED) pilot cohort study | Multiple sites                 | 165         | Influenza   | Not reported                | Not reported                                                             | Enid Hirst has agreed to be the patient/public representative for the project and has reviewed the proposal. She acted as patient and public represen | Not reported             | Enid's role will include the following:<br>2. reviewing the poster and information leaflet<br>3. patient/public representation on the Steering Committee<br>4. lay input into reporting | Enid's role include lay input into reporting and dissemination of findings |

**ADDITIONAL FILE 2**

**Table 2. Full study characteristics of included studies.**

† Denotes where excerpts are taken verbatim from study.

| Study | Country of conduct | Title | Multi-centre/<br>single centre | Sample Size | Field/Topic | Ethnic/Minority populations | Number of patients/ community representatives engaged in research                                                                   | Methods of Engagement <sup>†</sup> |                               |                                                                        |                                                          |
|-------|--------------------|-------|--------------------------------|-------------|-------------|-----------------------------|-------------------------------------------------------------------------------------------------------------------------------------|------------------------------------|-------------------------------|------------------------------------------------------------------------|----------------------------------------------------------|
|       |                    |       |                                |             |             |                             |                                                                                                                                     | Development of research question   | Selecting outcome             | Other activities                                                       | Dissemination and Implementation of results              |
|       |                    |       |                                |             |             |                             | tative for our project in the 2009 pandemic and was an independent member of the study Steering Committee. Enid is a founder member |                                    | and dissemination of findings | 5. liaison between the project and the Sheffield Emergency Care Forum. | Lynn Winspear, Enid Hirst and other members of SECF also |



**ADDITIONAL FILE 2**

**Table 2. Full study characteristics of included studies.**

† Denotes where excerpts are taken verbatim from study.

| Study | Country of conduct | Title | Multi-centre/<br>single centre | Sample Size | Field/Topic | Ethnic/Minority populations | Number of patients/ community representatives engaged in research | Methods of Engagement <sup>†</sup>                                                                                                           |                   |                                                                             |                                             |  |
|-------|--------------------|-------|--------------------------------|-------------|-------------|-----------------------------|-------------------------------------------------------------------|----------------------------------------------------------------------------------------------------------------------------------------------|-------------------|-----------------------------------------------------------------------------|---------------------------------------------|--|
|       |                    |       |                                |             |             |                             |                                                                   | Development of research question                                                                                                             | Selecting outcome | Other activities                                                            | Dissemination and Implementation of results |  |
|       |                    |       |                                |             |             |                             |                                                                   | of the Sheffield Emergency Care Forum. This is a patient and public representative group with a specific interest in emergency care research |                   | provided specific input into the project's lay summary and patient leaflets |                                             |  |

**ADDITIONAL FILE 2**

**Table 2. Full study characteristics of included studies.**

† Denotes where excerpts are taken verbatim from study.

| Study | Country of conduct | Title | Multi-centre/<br>single centre | Sample Size | Field/Topic | Ethnic/Minority populations | Number of patients/ community representatives engaged in research | Methods of Engagement <sup>†</sup>                                                                                                    |                   |                  |                                             |  |
|-------|--------------------|-------|--------------------------------|-------------|-------------|-----------------------------|-------------------------------------------------------------------|---------------------------------------------------------------------------------------------------------------------------------------|-------------------|------------------|---------------------------------------------|--|
|       |                    |       |                                |             |             |                             |                                                                   | Development of research question                                                                                                      | Selecting outcome | Other activities | Dissemination and Implementation of results |  |
|       |                    |       |                                |             |             |                             |                                                                   | . The Forum has reviewed this proposal and provided feedback. Enid will continue to provide a link between the project and the Forum. |                   |                  |                                             |  |

**ADDITIONAL FILE 2**

**Table 2. Full study characteristics of included studies.**

† Denotes where excerpts are taken verbatim from study.

| Study | Country of conduct | Title | Multi-centre/<br>single centre | Sample Size | Field/Topic | Ethnic/Minority populations | Number of patients/ community representatives engaged in research | Methods of Engagement <sup>†</sup>                                                     |                          |                         |                                                    |  |  |
|-------|--------------------|-------|--------------------------------|-------------|-------------|-----------------------------|-------------------------------------------------------------------|----------------------------------------------------------------------------------------|--------------------------|-------------------------|----------------------------------------------------|--|--|
|       |                    |       |                                |             |             |                             |                                                                   | <i>Development of research question</i>                                                | <i>Selecting outcome</i> | <i>Other activities</i> | <i>Dissemination and Implementation of results</i> |  |  |
|       |                    |       |                                |             |             |                             |                                                                   | Her role will include the following:                                                   |                          |                         |                                                    |  |  |
|       |                    |       |                                |             |             |                             |                                                                   | 1. reviewing the protocol and specifically advising on ethical issues and arrangements |                          |                         |                                                    |  |  |

**ADDITIONAL FILE 2**

**Table 2. Full study characteristics of included studies.**

† Denotes where excerpts are taken verbatim from study.

| Study                   | Country of conduct | Title                                                                                                                               | Multi-centre/ single centre | Sample Size                            | Field/ Topic                            | Ethnic/ Minority populations | Number of patients/ community representatives engaged in research | Methods of Engagement <sup>†</sup>      |                   |                                                                                                                       |                                             |  |
|-------------------------|--------------------|-------------------------------------------------------------------------------------------------------------------------------------|-----------------------------|----------------------------------------|-----------------------------------------|------------------------------|-------------------------------------------------------------------|-----------------------------------------|-------------------|-----------------------------------------------------------------------------------------------------------------------|---------------------------------------------|--|
|                         |                    |                                                                                                                                     |                             |                                        |                                         |                              |                                                                   | Development of research question        | Selection outcome | Other activities                                                                                                      | Dissemination and Implementation of results |  |
|                         |                    |                                                                                                                                     |                             |                                        |                                         |                              |                                                                   | for data protection and confidentiality |                   |                                                                                                                       |                                             |  |
| Mohatt, G.V., 2014 [28] | USA                | Feasibility of a Community Intervention for the Prevention of Suicide and Alcohol Abuse with Yup'ik Alaska Native Youth: The Elluam | Multiple sites              | ET study-61 youth<br>YA study-53 youth | Prevention of Suicide and Alcohol Abuse | Yup'ik ethnicity             | Not reported                                                      | Not reported                            | Not reported      | Planning, community development work, and development of prevention activity modules that would constitute the future | Not reported                                |  |

**ADDITIONAL FILE 2**

**Table 2. Full study characteristics of included studies.**

† Denotes where excerpts are taken verbatim from study.

| Study | Country of conduct | Title                                                | Multi-centre/<br>single centre | Sample Size | Field/Topic | Ethnic/Minority populations | Number of patients/community representatives engaged in research | Methods of Engagement <sup>†</sup>      |                          |                         |                                                                                                                                                                                           |
|-------|--------------------|------------------------------------------------------|--------------------------------|-------------|-------------|-----------------------------|------------------------------------------------------------------|-----------------------------------------|--------------------------|-------------------------|-------------------------------------------------------------------------------------------------------------------------------------------------------------------------------------------|
|       |                    |                                                      |                                |             |             |                             |                                                                  | <i>Development of research question</i> | <i>Selecting outcome</i> | <i>Other activities</i> | <i>Dissemination and Implementation of results</i>                                                                                                                                        |
|       |                    | Tungiinun and Yupiucimta Asvairtuum allerkaa Studies |                                |             |             |                             |                                                                  |                                         |                          |                         | intervention as implemented was conducted by community members with the assistance of local and university project staff over a one (YA) or two (ET) year time period prior to any module |

**ADDITIONAL FILE 2**

**Table 2. Full study characteristics of included studies.**

† Denotes where excerpts are taken verbatim from study.

| Study | Country of conduct | Title | Multi-centre/<br>single centre | Sample Size | Field/Topic | Ethnic/<br>Minority populations | Number of patients/<br>community representatives engaged in research | Methods of Engagement <sup>†</sup>      |                          |                         |                                                                                                                                  |
|-------|--------------------|-------|--------------------------------|-------------|-------------|---------------------------------|----------------------------------------------------------------------|-----------------------------------------|--------------------------|-------------------------|----------------------------------------------------------------------------------------------------------------------------------|
|       |                    |       |                                |             |             |                                 |                                                                      | <i>Development of research question</i> | <i>Selecting outcome</i> | <i>Other activities</i> | <i>Dissemination and Implementation of results</i>                                                                               |
|       |                    |       |                                |             |             |                                 |                                                                      |                                         |                          |                         | delivery in the intervention activities.                                                                                         |
|       |                    |       |                                |             |             |                                 |                                                                      |                                         |                          |                         | Community planning groups developed the interventions with representation from youth, parents, community leadership, Elders, and |

**ADDITIONAL FILE 2**

**Table 2. Full study characteristics of included studies.**

† Denotes where excerpts are taken verbatim from study.

| Study | Country of conduct | Title | Multi-centre/<br>single centre | Sample Size | Field/Topic | Ethnic/Minority populations | Number of patients/community representatives engaged in research | Methods of Engagement <sup>†</sup> |                   |                  |                                             |                                                                                                                                                                                                        |
|-------|--------------------|-------|--------------------------------|-------------|-------------|-----------------------------|------------------------------------------------------------------|------------------------------------|-------------------|------------------|---------------------------------------------|--------------------------------------------------------------------------------------------------------------------------------------------------------------------------------------------------------|
|       |                    |       |                                |             |             |                             |                                                                  | Development of research question   | Selecting outcome | Other activities | Dissemination and Implementation of results |                                                                                                                                                                                                        |
|       |                    |       |                                |             |             |                             |                                                                  |                                    |                   |                  |                                             | university researchers through a process described in Rasmus et al. (this issue). This work, in the ET community, resulted in the Qungasvik (toolbox; Alakanuk Community Planning Group et al., 2008). |

**ADDITIONAL FILE 2**

**Table 2. Full study characteristics of included studies.**

† Denotes where excerpts are taken verbatim from study.

| Study | Country of conduct | Title | Multi-centre/<br>single centre | Sample Size | Field/Topic | Ethnic/<br>Minority populations | Number of patients/<br>community representatives engaged in research | Methods of Engagement <sup>†</sup> |                   |                  |                                             |                                                                                                                                                                                                           |
|-------|--------------------|-------|--------------------------------|-------------|-------------|---------------------------------|----------------------------------------------------------------------|------------------------------------|-------------------|------------------|---------------------------------------------|-----------------------------------------------------------------------------------------------------------------------------------------------------------------------------------------------------------|
|       |                    |       |                                |             |             |                                 |                                                                      | Development of research question   | Selecting outcome | Other activities | Dissemination and Implementation of results |                                                                                                                                                                                                           |
|       |                    |       |                                |             |             |                                 |                                                                      |                                    |                   |                  |                                             | <p>Rather than offering a prescriptive manual of specific intervention activities, the Qungasvik was developed as a process manual for intervention . It provides a flexible format, selection from a</p> |



**ADDITIONAL FILE 2**

**Table 2. Full study characteristics of included studies.**

† Denotes where excerpts are taken verbatim from study.

| Study | Country of conduct | Title | Multi-centre/<br>single centre | Sample Size | Field/Topic | Ethnic/<br>Minority populations | Number of patients/<br>community representatives engaged in research | Methods of Engagement <sup>†</sup>      |                          |                         |                                                                                                                                                                                |
|-------|--------------------|-------|--------------------------------|-------------|-------------|---------------------------------|----------------------------------------------------------------------|-----------------------------------------|--------------------------|-------------------------|--------------------------------------------------------------------------------------------------------------------------------------------------------------------------------|
|       |                    |       |                                |             |             |                                 |                                                                      | <i>Development of research question</i> | <i>Selecting outcome</i> | <i>Other activities</i> | <i>Dissemination and Implementation of results</i>                                                                                                                             |
|       |                    |       |                                |             |             |                                 |                                                                      |                                         |                          |                         | range of activities at different levels (individual, family, community) , and basic outlines for prevention activities, all situated within a community development framework. |

**ADDITIONAL FILE 2**

**Table 2. Full study characteristics of included studies.**

† Denotes where excerpts are taken verbatim from study.

| Study                   | Country of conduct | Title                                                                                                                                                            | Multi-centre/<br>single centre | Sample Size | Field/Topic | Ethnic/Minority populations     | Number of patients/ community representatives engaged in research | Methods of Engagement <sup>†</sup>      |                          |                                                                                                                                               |                                                    |
|-------------------------|--------------------|------------------------------------------------------------------------------------------------------------------------------------------------------------------|--------------------------------|-------------|-------------|---------------------------------|-------------------------------------------------------------------|-----------------------------------------|--------------------------|-----------------------------------------------------------------------------------------------------------------------------------------------|----------------------------------------------------|
|                         |                    |                                                                                                                                                                  |                                |             |             |                                 |                                                                   | <i>Development of research question</i> | <i>Selecting outcome</i> | <i>Other activities</i>                                                                                                                       | <i>Dissemination and Implementation of results</i> |
| Koladouz, F., 2014 [29] | Canada             | Impact of the Healthy Foods North nutrition intervention program on Inuit and Inuvialuit food consumption and preparation methods in Canadian Arctic communities | Multiple sites                 | 332         | Nutrition   | Canadian Indigenous populations | Not reported                                                      | Not reported                            | Not reported             | Community participatory research [24] was used to identify the themes of the interventions and have previously been described in detail [13]" | Not reported                                       |
|                         |                    |                                                                                                                                                                  |                                |             |             |                                 |                                                                   |                                         |                          | Ref[13]: "On the basis of dietary                                                                                                             |                                                    |

**ADDITIONAL FILE 2**

**Table 2. Full study characteristics of included studies.**

† Denotes where excerpts are taken verbatim from study.

| Study | Country of conduct | Title | Multi-centre/<br>single centre | Sample Size | Field/Topic | Ethnic/Minority populations | Number of patients/community representatives engaged in research | Methods of Engagement <sup>†</sup>      |                          |                         |                                                    |                                                                                                                                                                                              |
|-------|--------------------|-------|--------------------------------|-------------|-------------|-----------------------------|------------------------------------------------------------------|-----------------------------------------|--------------------------|-------------------------|----------------------------------------------------|----------------------------------------------------------------------------------------------------------------------------------------------------------------------------------------------|
|       |                    |       |                                |             |             |                             |                                                                  | <i>Development of research question</i> | <i>Selecting outcome</i> | <i>Other activities</i> | <i>Dissemination and Implementation of results</i> |                                                                                                                                                                                              |
|       |                    |       |                                |             |             |                             |                                                                  |                                         |                          |                         |                                                    | intake data (Sharma et al., 2009, 2010a), formative research (Gittelsohn et al., 2010) and using a community participatory process, a novel, integrated, multi-institutional chronic disease |

**ADDITIONAL FILE 2**

**Table 2. Full study characteristics of included studies.**

† Denotes where excerpts are taken verbatim from study.

| Study                      | Country of conduct | Title                                           | Multi-centre/ single centre | Sample Size | Field/ Topic                   | Ethnic/ Minority populations | Number of patients/ community representatives engaged in research | Methods of Engagement <sup>†</sup> |                   |                                                                                                                      |                                             |
|----------------------------|--------------------|-------------------------------------------------|-----------------------------|-------------|--------------------------------|------------------------------|-------------------------------------------------------------------|------------------------------------|-------------------|----------------------------------------------------------------------------------------------------------------------|---------------------------------------------|
|                            |                    |                                                 |                             |             |                                |                              |                                                                   | Development of research question   | Selection outcome | Other activities                                                                                                     | Dissemination and Implementation of results |
|                            |                    |                                                 |                             |             |                                |                              |                                                                   |                                    |                   | prevention programme called Healthy Foods North (HFN) was developed for Inuit and Inuvialuit in the Canadian Arctic" |                                             |
| O'Callaghan, P., 2014 [32] | UK                 | A pilot study of a family focused, psychosocial | Multiple sites              | 159         | Post-traumatic stress symptoms | Not reported                 | Not reported                                                      | Not reported                       | Not reported      | The study protocol was approval by the ethical                                                                       | Not reported                                |

**ADDITIONAL FILE 2**

**Table 2. Full study characteristics of included studies.**

† Denotes where excerpts are taken verbatim from study.

| Study | Country of conduct | Title                                                                                                             | Multi-centre/<br>single centre | Sample Size | Field/Topic | Ethnic/<br>Minority populations | Number of patients/<br>community representatives engaged in research | Methods of Engagement <sup>†</sup> |                   |                  |                                                                                                                                                                                                |
|-------|--------------------|-------------------------------------------------------------------------------------------------------------------|--------------------------------|-------------|-------------|---------------------------------|----------------------------------------------------------------------|------------------------------------|-------------------|------------------|------------------------------------------------------------------------------------------------------------------------------------------------------------------------------------------------|
|       |                    |                                                                                                                   |                                |             |             |                                 |                                                                      | Development of research question   | Selecting outcome | Other activities | Dissemination and Implementation of results                                                                                                                                                    |
|       |                    | intervention with war-exposed youth at risk of attack and abduction in north-eastern Democratic Republic of Congo |                                |             |             |                                 |                                                                      |                                    |                   |                  | review board in the lead researcher's university and then by a 'Community Advisory Board', headed by a community pastor with a Masters in trauma interventions with youth victims of community |





**ADDITIONAL FILE 2**

**Table 2. Full study characteristics of included studies.**

† Denotes where excerpts are taken verbatim from study.

| Study                   | Country of conduct | Title                                                                                                                                                       | Multi-centre/<br>single centre | Sample Size | Field/Topic                                                                | Ethnic/Minority populations | Number of patients/ community representatives engaged in research | Methods of Engagement <sup>†</sup> |                   |                                                                                                                                                    |                                             |
|-------------------------|--------------------|-------------------------------------------------------------------------------------------------------------------------------------------------------------|--------------------------------|-------------|----------------------------------------------------------------------------|-----------------------------|-------------------------------------------------------------------|------------------------------------|-------------------|----------------------------------------------------------------------------------------------------------------------------------------------------|---------------------------------------------|
|                         |                    |                                                                                                                                                             |                                |             |                                                                            |                             |                                                                   | Development of research question   | Selecting outcome | Other activities                                                                                                                                   | Dissemination and Implementation of results |
|                         |                    |                                                                                                                                                             |                                |             |                                                                            |                             |                                                                   |                                    |                   | social interventions.                                                                                                                              |                                             |
| Bowrey, D.J., 2014 [22] | UK                 | A randomised controlled trial of six weeks of home enteral nutrition versus standard care after oesophagectomy or total gastrectomy for cancer: report on a | Single site                    | 54          | Home enteral nutrition after esophagectomy or total gastrectomy for cancer | Not reported                | Not reported                                                      | Not reported                       | Not reported      | No specific details about how patients were involved in the full text. However, authors state in protocol "A trial management group has been setup | Not reported                                |



**ADDITIONAL FILE 2**

**Table 2. Full study characteristics of included studies.**

† Denotes where excerpts are taken verbatim from study.

| Study | Country of conduct | Title                       | Multi-centre/<br>single centre | Sample Size | Field/Topic | Ethnic/<br>Minority populations | Number of patients/<br>community representatives engaged in research | Methods of Engagement†           |                   |                  |                                                                                                                                                                        |
|-------|--------------------|-----------------------------|--------------------------------|-------------|-------------|---------------------------------|----------------------------------------------------------------------|----------------------------------|-------------------|------------------|------------------------------------------------------------------------------------------------------------------------------------------------------------------------|
|       |                    |                             |                                |             |             |                                 |                                                                      | Development of research question | Selecting outcome | Other activities | Dissemination and Implementation of results                                                                                                                            |
|       |                    | pilot and feasibility study |                                |             |             |                                 |                                                                      |                                  |                   |                  | including the investigators, representatives from the Leicester Clinical Trials Unit, and two former patients (one with their partner). This group will meet every six |

**ADDITIONAL FILE 2**

**Table 2. Full study characteristics of included studies.**

† Denotes where excerpts are taken verbatim from study.

| Study                     | Country of conduct | Title                                                                                                                                    | Multi-centre/<br>single centre | Sample Size | Field/Topic          | Ethnic/Minority populations                                                                                    | Number of patients/ community representatives engaged in research | Methods of Engagement†           |                   |                                                                                                       |                                                                |
|---------------------------|--------------------|------------------------------------------------------------------------------------------------------------------------------------------|--------------------------------|-------------|----------------------|----------------------------------------------------------------------------------------------------------------|-------------------------------------------------------------------|----------------------------------|-------------------|-------------------------------------------------------------------------------------------------------|----------------------------------------------------------------|
|                           |                    |                                                                                                                                          |                                |             |                      |                                                                                                                |                                                                   | Development of research question | Selection outcome | Other activities                                                                                      | Dissemination and Implementation of results                    |
|                           |                    |                                                                                                                                          |                                |             |                      |                                                                                                                |                                                                   |                                  |                   |                                                                                                       | months for the duration of the study to review study progress" |
| Littlewood, E., 2015 [41] | UK                 | A randomised controlled trial of computerised cognitive behaviour therapy for the treatment of depression in primary care: the Randomise | Multiple sites                 | 691         | Depression Treatment | Mixed (white and black African), Mixed (white and black Caribbean), Any other mixed background, Asian or Asian | Not reported                                                      | Not reported                     | Not reported      | The REEACT trial received patient and public participation input at the design, conduct, analysis and | Not reported                                                   |

**ADDITIONAL FILE 2**

**Table 2. Full study characteristics of included studies.**

† Denotes where excerpts are taken verbatim from study.

| Study | Country of conduct | Title                                                                                      | Multi-centre/<br>single centre | Sample Size | Field/Topic | Ethnic/Minority populations                                | Number of patients/ community representatives engaged in research | Methods of Engagement <sup>†</sup> |                   |                                                                                                                                                                          |                                             |
|-------|--------------------|--------------------------------------------------------------------------------------------|--------------------------------|-------------|-------------|------------------------------------------------------------|-------------------------------------------------------------------|------------------------------------|-------------------|--------------------------------------------------------------------------------------------------------------------------------------------------------------------------|---------------------------------------------|
|       |                    |                                                                                            |                                |             |             |                                                            |                                                                   | Development of research question   | Selection outcome | Other activities                                                                                                                                                         | Dissemination and Implementation of results |
|       |                    | d Evaluation of the Effectiveness and Acceptability of Computerised Therapy (REEACT) trial |                                |             |             | british-indian, Asian or British-Pakistani, Chinese, Other |                                                                   |                                    |                   | interpretation stages. We received input from those with lived experience of depression in the design of all research materials. The REEACT trial received oversight via |                                             |

**ADDITIONAL FILE 2**

**Table 2. Full study characteristics of included studies.**

† Denotes where excerpts are taken verbatim from study.

| Study | Country of conduct | Title | Multi-centre/<br>single centre | Sample Size | Field/Topic | Ethnic/<br>Minority populations | Number of patients/<br>community representatives engaged in research | Methods of Engagement <sup>†</sup> |                   |                  |                                                                                                                                                                             |
|-------|--------------------|-------|--------------------------------|-------------|-------------|---------------------------------|----------------------------------------------------------------------|------------------------------------|-------------------|------------------|-----------------------------------------------------------------------------------------------------------------------------------------------------------------------------|
|       |                    |       |                                |             |             |                                 |                                                                      | Development of research question   | Selecting outcome | Other activities | Dissemination and Implementation of results                                                                                                                                 |
|       |                    |       |                                |             |             |                                 |                                                                      |                                    |                   |                  | committee membership from members with lived experience of common mental health problems and a representative of a user-led self-help organisation. A user-led organisation |

**ADDITIONAL FILE 2**

**Table 2. Full study characteristics of included studies.**

† Denotes where excerpts are taken verbatim from study.

| Study                   | Country of conduct | Title                                                             | Multi-centre/<br>single centre | Sample Size | Field/Topic  | Ethnic/Minority populations | Number of patients/communit<br>y represent<br>atives engaged in research | Methods of Engagement <sup>†</sup>      |                          |                                                         |                                                                                                                           |
|-------------------------|--------------------|-------------------------------------------------------------------|--------------------------------|-------------|--------------|-----------------------------|--------------------------------------------------------------------------|-----------------------------------------|--------------------------|---------------------------------------------------------|---------------------------------------------------------------------------------------------------------------------------|
|                         |                    |                                                                   |                                |             |              |                             |                                                                          | <i>Development of research question</i> | <i>Selecting outcome</i> | <i>Other activities</i>                                 | <i>Dissemination and Implementation of results</i>                                                                        |
|                         |                    |                                                                   |                                |             |              |                             |                                                                          |                                         |                          |                                                         | n (Anxiety UK and Self-Help Services via its Chief Executive) acted as co-applicant and collaborator on the REEACT trial. |
| McMilan, A., 2015. [42] | UK                 | A multicentre randomised controlled trial and economic evaluation | Multiple sites                 | 278         | Sleep Apnoea | Asian, other                | 2                                                                        | Not reported                            | Not reported             | Two patient representatives participated in the PREDICT | Frank Govan-<br>raised awareness of the study to                                                                          |

**ADDITIONAL FILE 2**

**Table 2. Full study characteristics of included studies.**

† Denotes where excerpts are taken verbatim from study.

| Study | Country of conduct | Title                                                                                                                  | Multi-centre/<br>single centre | Sample Size | Field/Topic | Ethnic/<br>Minority populations | Number of patients/<br>community representatives engaged in research | Methods of Engagement <sup>†</sup>                                                                                                                                                               |                   |                  |                                                                                                                                                                       |
|-------|--------------------|------------------------------------------------------------------------------------------------------------------------|--------------------------------|-------------|-------------|---------------------------------|----------------------------------------------------------------------|--------------------------------------------------------------------------------------------------------------------------------------------------------------------------------------------------|-------------------|------------------|-----------------------------------------------------------------------------------------------------------------------------------------------------------------------|
|       |                    |                                                                                                                        |                                |             |             |                                 |                                                                      | Development of research question                                                                                                                                                                 | Selecting outcome | Other activities | Dissemination and Implementation of results                                                                                                                           |
|       |                    | of continuous positive airway pressure for the treatment of obstructive sleep apnoea syndrome in older people: PREDICT |                                |             |             |                                 |                                                                      | management; in particular, Mr Frank Govan from Oxford acted as the patient representative. He attended the TSC meetings and his feedback was very helpful in progressing the trial. For example, |                   |                  | the Sleep Apnoea Trust Association, which in turn, publicised the study with their members. Members of the Welsh Sleep Apnoea Society have also supported the PREDICT |

**ADDITIONAL FILE 2**

**Table 2. Full study characteristics of included studies.**

† Denotes where excerpts are taken verbatim from study.

| Study | Country of conduct | Title | Multi-centre/<br>single centre | Sample Size | Field/Topic | Ethnic/Minority populations | Number of patients/ community representatives engaged in research | Methods of Engagement <sup>†</sup> |                                                                                                                                                                                    |                  |                                             |
|-------|--------------------|-------|--------------------------------|-------------|-------------|-----------------------------|-------------------------------------------------------------------|------------------------------------|------------------------------------------------------------------------------------------------------------------------------------------------------------------------------------|------------------|---------------------------------------------|
|       |                    |       |                                |             |             |                             |                                                                   | Development of research question   | Selecting outcome                                                                                                                                                                  | Other activities | Dissemination and Implementation of results |
|       |                    |       |                                |             |             |                             |                                                                   |                                    | he raised awareness of the study to the Sleep Apnoea Trust Association, which in turn, publicised the study with their members. The protocol was discussed with Sleep Apnoea Trust |                  | study by providing publicity for the trial. |

**ADDITIONAL FILE 2**

**Table 2. Full study characteristics of included studies.**

† Denotes where excerpts are taken verbatim from study.

| Study | Country of conduct | Title | Multi-centre/<br>single centre | Sample Size | Field/Topic | Ethnic/<br>Minority populations | Number of patients/<br>community representatives engaged in research | Methods of Engagement <sup>†</sup> |                   |                  |                                                                                                                                                                                                                                                                                    |
|-------|--------------------|-------|--------------------------------|-------------|-------------|---------------------------------|----------------------------------------------------------------------|------------------------------------|-------------------|------------------|------------------------------------------------------------------------------------------------------------------------------------------------------------------------------------------------------------------------------------------------------------------------------------|
|       |                    |       |                                |             |             |                                 |                                                                      | Development of research question   | Selecting outcome | Other activities | Dissemination and Implementation of results                                                                                                                                                                                                                                        |
|       |                    |       |                                |             |             |                                 |                                                                      |                                    |                   |                  | Association members at their annual meeting in 2012, and we were invited to present the results at their 2014 meeting ( <a href="http://www.sleep-apnoea-trust.org/user/image/sm52.pdf">www.sleep-apnoea-trust.org/user/image/sm52.pdf</a> ).<br>Members of the Welsh Sleep Apnoea |







**ADDITIONAL FILE 2**

**Table 2. Full study characteristics of included studies.**

† Denotes where excerpts are taken verbatim from study.

| Study | Country of conduct | Title | Multi-centre/<br>single centre | Sample Size | Field/Topic | Ethnic/<br>Minority populations | Number of patients/<br>community representatives engaged in research | Methods of Engagement†           |                   |                  |                                             |                                                                                                                                                                                          |
|-------|--------------------|-------|--------------------------------|-------------|-------------|---------------------------------|----------------------------------------------------------------------|----------------------------------|-------------------|------------------|---------------------------------------------|------------------------------------------------------------------------------------------------------------------------------------------------------------------------------------------|
|       |                    |       |                                |             |             |                                 |                                                                      | Development of research question | Selecting outcome | Other activities | Dissemination and Implementation of results |                                                                                                                                                                                          |
|       |                    |       |                                |             |             |                                 |                                                                      |                                  |                   |                  |                                             | the rigours of participating in research studies with the TMG. These comments have been taken into account in designing subsequent trails. Mr Govern also voted at TSC meetings, and his |

**ADDITIONAL FILE 2**

**Table 2. Full study characteristics of included studies.**

† Denotes where excerpts are taken verbatim from study.

| Study | Country of conduct | Title | Multi-centre/<br>single centre | Sample Size | Field/Topic | Ethnic/<br>Minority populations | Number of patients/<br>community representatives engaged in research | Methods of Engagement†           |                   |                  |                                                                                                                                                                      |
|-------|--------------------|-------|--------------------------------|-------------|-------------|---------------------------------|----------------------------------------------------------------------|----------------------------------|-------------------|------------------|----------------------------------------------------------------------------------------------------------------------------------------------------------------------|
|       |                    |       |                                |             |             |                                 |                                                                      | Development of research question | Selecting outcome | Other activities | Dissemination and Implementation of results                                                                                                                          |
|       |                    |       |                                |             |             |                                 |                                                                      |                                  |                   |                  | independent views were sought when discussing topics such as opening new trial sites, through to trial authorship. The patients who participated in PREDICT from the |

**ADDITIONAL FILE 2**

**Table 2. Full study characteristics of included studies.**

† Denotes where excerpts are taken verbatim from study.

| Study | Country of conduct | Title | Multi-centre/<br>single centre | Sample Size | Field/Topic | Ethnic/<br>Minority populations | Number of patients/<br>community representatives engaged in research | Methods of Engagement†           |                   |                  |                                             |                                                                                                                                                                                                |
|-------|--------------------|-------|--------------------------------|-------------|-------------|---------------------------------|----------------------------------------------------------------------|----------------------------------|-------------------|------------------|---------------------------------------------|------------------------------------------------------------------------------------------------------------------------------------------------------------------------------------------------|
|       |                    |       |                                |             |             |                                 |                                                                      | Development of research question | Selecting outcome | Other activities | Dissemination and Implementation of results |                                                                                                                                                                                                |
|       |                    |       |                                |             |             |                                 |                                                                      |                                  |                   |                  |                                             | London centre were invited to an annual patient and public involvement event at the Royal Brompton Hospital (once their direct involvement in the trial was over) to provide feedback on their |

**ADDITIONAL FILE 2**

**Table 2. Full study characteristics of included studies.**

† Denotes where excerpts are taken verbatim from study.

| Study | Country of conduct | Title | Multi-centre/<br>single centre | Sample Size | Field/Topic | Ethnic/Minority populations | Number of patients/ community representatives engaged in research | Methods of Engagement <sup>†</sup> |                   |                  |                                                                                                                                                                                          |
|-------|--------------------|-------|--------------------------------|-------------|-------------|-----------------------------|-------------------------------------------------------------------|------------------------------------|-------------------|------------------|------------------------------------------------------------------------------------------------------------------------------------------------------------------------------------------|
|       |                    |       |                                |             |             |                             |                                                                   | Development of research question   | Selecting outcome | Other activities | Dissemination and Implementation of results                                                                                                                                              |
|       |                    |       |                                |             |             |                             |                                                                   |                                    |                   |                  | experiences . This feedback was collated and has been used to improve the study facilities at the site, as well as trial logistics, for example increased time for travel between sites. |

**ADDITIONAL FILE 2**

**Table 2. Full study characteristics of included studies.**

† Denotes where excerpts are taken verbatim from study.

| Study                   | Country of conduct | Title                                                                                                                                                        | Multi-centre/<br>single centre | Sample Size | Field/Topic        | Ethnic/Minority populations | Number of patients/ community representatives engaged in research | Methods of Engagement <sup>†</sup> |                   |                                                                                                                                                                                           |                                             |
|-------------------------|--------------------|--------------------------------------------------------------------------------------------------------------------------------------------------------------|--------------------------------|-------------|--------------------|-----------------------------|-------------------------------------------------------------------|------------------------------------|-------------------|-------------------------------------------------------------------------------------------------------------------------------------------------------------------------------------------|---------------------------------------------|
|                         |                    |                                                                                                                                                              |                                |             |                    |                             |                                                                   | Development of research question   | Selecting outcome | Other activities                                                                                                                                                                          | Dissemination and Implementation of results |
| Gaucher, S., 2016, [43] | France             | Assessment of a Standardized Pre-Operative Telephone Checklist Designed to Avoid Late Cancellation of Ambulatory Surgery: The AMBUPROG Multicenter Randomize | Multiple sites                 | 4074        | Ambulatory Surgery | Not reported                | 24                                                                | Not reported                       | Not reported      | During the development of the intervention a checklist was created. "Given the reported effectiveness of checklists in reducing surgical complications and mortality [12], we developed a | Not reported                                |

**ADDITIONAL FILE 2**

**Table 2. Full study characteristics of included studies.**

† Denotes where excerpts are taken verbatim from study.

| Study                 | Country of conduct | Title                                                      | Multi-centre/<br>single centre | Sample Size | Field/Topic | Ethnic/<br>Minority populations           | Number of patients/<br>community representatives engaged in research | Methods of Engagement <sup>†</sup> |                   |                                                                                                              |                                             |
|-----------------------|--------------------|------------------------------------------------------------|--------------------------------|-------------|-------------|-------------------------------------------|----------------------------------------------------------------------|------------------------------------|-------------------|--------------------------------------------------------------------------------------------------------------|---------------------------------------------|
|                       |                    |                                                            |                                |             |             |                                           |                                                                      | Development of research question   | Selecting outcome | Other activities                                                                                             | Dissemination and Implementation of results |
|                       |                    | d Controlled Trial                                         |                                |             |             |                                           |                                                                      |                                    |                   | standardized pre-operative checklist that could be delivered to each patient via an automated phone system." |                                             |
| Fraser, R., 2015 [44] | USA                | PACES in epilepsy: Results of a self-management randomized | Single site                    | 92          | Epilepsy    | Black, Latino, Asian, Other (unspecified) | 50 surveys (165 returned)+ 2 focus groups of 10 patients + 22 adults | Not reported                       | Not reported      | The survey was then refined by two focus groups of 10 adults with                                            | Not reported                                |



**ADDITIONAL FILE 2**

**Table 2. Full study characteristics of included studies.**

† Denotes where excerpts are taken verbatim from study.

| Study | Country of conduct | Title            | Multi-centre/<br>single centre | Sample Size | Field/Topic | Ethnic/<br>Minority populations | Number of patients/<br>community representatives engaged in research | Methods of Engagement <sup>†</sup>      |                          |                         |                                                                                                                                                                                             |
|-------|--------------------|------------------|--------------------------------|-------------|-------------|---------------------------------|----------------------------------------------------------------------|-----------------------------------------|--------------------------|-------------------------|---------------------------------------------------------------------------------------------------------------------------------------------------------------------------------------------|
|       |                    |                  |                                |             |             |                                 |                                                                      | <i>Development of research question</i> | <i>Selecting outcome</i> | <i>Other activities</i> | <i>Dissemination and Implementation of results</i>                                                                                                                                          |
|       |                    | controlled trial |                                |             |             |                                 | with epilepsy from a local affiliate group                           |                                         |                          |                         | epilepsy, each at the University of Washington-Harborview Medical Center. The survey was then mailed to 250 adults with epilepsy who were being treated at either the UW-Harborview Medical |

**ADDITIONAL FILE 2**

**Table 2. Full study characteristics of included studies.**

† Denotes where excerpts are taken verbatim from study.

| Study | Country of conduct | Title | Multi-centre/ single centre | Sample Size | Field/ Topic | Ethnic/ Minority populations | Number of patients/ community representatives engaged in research | Methods of Engagement <sup>†</sup> |                   |                  |                                                                                                                                                                                 |
|-------|--------------------|-------|-----------------------------|-------------|--------------|------------------------------|-------------------------------------------------------------------|------------------------------------|-------------------|------------------|---------------------------------------------------------------------------------------------------------------------------------------------------------------------------------|
|       |                    |       |                             |             |              |                              |                                                                   | Development of research question   | Selecting outcome | Other activities | Dissemination and Implementation of results                                                                                                                                     |
|       |                    |       |                             |             |              |                              |                                                                   |                                    |                   |                  | Center or the Swedish Medical Center, and a group of 22 adults with epilepsy in local affiliate support groups. The survey participants in the mailing were screened for marked |



**ADDITIONAL FILE 2**

**Table 2. Full study characteristics of included studies.**

† Denotes where excerpts are taken verbatim from study.

| Study | Country of conduct | Title | Multi-centre/ single centre | Sample Size | Field/ Topic | Ethnic/ Minority populations | Number of patients/ community representatives engaged in research | Methods of Engagement†                  |                          |                         |                                                    |                                                                                                                                                                                                 |
|-------|--------------------|-------|-----------------------------|-------------|--------------|------------------------------|-------------------------------------------------------------------|-----------------------------------------|--------------------------|-------------------------|----------------------------------------------------|-------------------------------------------------------------------------------------------------------------------------------------------------------------------------------------------------|
|       |                    |       |                             |             |              |                              |                                                                   | <i>Development of research question</i> | <i>Selecting outcome</i> | <i>Other activities</i> | <i>Dissemination and Implementation of results</i> |                                                                                                                                                                                                 |
|       |                    |       |                             |             |              |                              |                                                                   |                                         |                          |                         |                                                    | rate). There was very high response reliability (internal consistency) across all domains in the survey. A comprehensive description of the survey findings is available in Fraser et al., with |

**ADDITIONAL FILE 2**

**Table 2. Full study characteristics of included studies.**

† Denotes where excerpts are taken verbatim from study.

| Study                        | Country of conduct | Title                                                                                                         | Multi-centre/<br>single centre | Sample Size | Field/Topic | Ethnic/Minority populations | Number of patients/ community representatives engaged in research | Methods of Engagement <sup>†</sup> |                   |                                                                                                                                      |                                                        |
|------------------------------|--------------------|---------------------------------------------------------------------------------------------------------------|--------------------------------|-------------|-------------|-----------------------------|-------------------------------------------------------------------|------------------------------------|-------------------|--------------------------------------------------------------------------------------------------------------------------------------|--------------------------------------------------------|
|                              |                    |                                                                                                               |                                |             |             |                             |                                                                   | Development of research question   | Selecting outcome | Other activities                                                                                                                     | Dissemination and Implementation of results            |
|                              |                    |                                                                                                               |                                |             |             |                             |                                                                   |                                    |                   |                                                                                                                                      | implications for the development of the PACES program" |
| Gimeno-Santos, E., 2015 [45] | Spain              | The PROactive instruments to measure physical activity in patients with chronic obstructive pulmonary disease | Multiple sites                 | 236         | COPD        | Not reported                | Not reported                                                      | Not reported                       | Not reported      | Within the framework of the European Union Innovative Medicines Initiative PROactive project (www.proactivecopd.com) our group first | Not reported                                           |

**ADDITIONAL FILE 2**

**Table 2. Full study characteristics of included studies.**

† Denotes where excerpts are taken verbatim from study.

| Study | Country of conduct | Title | Multi-centre/<br>single centre | Sample Size | Field/Topic | Ethnic/<br>Minority populations | Number of patients/<br>community representatives engaged in research | Methods of Engagement <sup>†</sup>      |                          |                         |                                                                                                                                                                                                             |
|-------|--------------------|-------|--------------------------------|-------------|-------------|---------------------------------|----------------------------------------------------------------------|-----------------------------------------|--------------------------|-------------------------|-------------------------------------------------------------------------------------------------------------------------------------------------------------------------------------------------------------|
|       |                    |       |                                |             |             |                                 |                                                                      | <i>Development of research question</i> | <i>Selecting outcome</i> | <i>Other activities</i> | <i>Dissemination and Implementation of results</i>                                                                                                                                                          |
|       |                    |       |                                |             |             |                                 |                                                                      |                                         |                          |                         | conducted qualitative research and drafted a conceptual framework to set out the concept of physical activity from patients' experience and to provide the necessary basis to generate an item pool for two |



**ADDITIONAL FILE 2**

**Table 2. Full study characteristics of included studies.**

† Denotes where excerpts are taken verbatim from study.

| Study | Country of conduct | Title | Multi-centre/<br>single centre | Sample Size | Field/Topic | Ethnic/Minority populations | Number of patients/ community representatives engaged in research | Methods of Engagement <sup>†</sup>      |                          |                         |                                                    |                                                                                                                                                                                                         |
|-------|--------------------|-------|--------------------------------|-------------|-------------|-----------------------------|-------------------------------------------------------------------|-----------------------------------------|--------------------------|-------------------------|----------------------------------------------------|---------------------------------------------------------------------------------------------------------------------------------------------------------------------------------------------------------|
|       |                    |       |                                |             |             |                             |                                                                   | <i>Development of research question</i> | <i>Selecting outcome</i> | <i>Other activities</i> | <i>Dissemination and Implementation of results</i> |                                                                                                                                                                                                         |
|       |                    |       |                                |             |             |                             |                                                                   |                                         |                          |                         |                                                    | was also approved by patient advisory boards and the advisory board provided advice to guide the whole process for the item reduction and validation of the tools.<br>Dobbels F, de Jong C, Drost E, et |



**ADDITIONAL FILE 2**

**Table 2. Full study characteristics of included studies.**

† Denotes where excerpts are taken verbatim from study.

| Study                     | Country of conduct | Title                                                                                | Multi-centre/<br>single centre | Sample Size | Field/Topic            | Ethnic/Minority populations                                                 | Number of patients/ community representatives engaged in research | Methods of Engagement†           |                   |                                                                                  |                                                                                                           |
|---------------------------|--------------------|--------------------------------------------------------------------------------------|--------------------------------|-------------|------------------------|-----------------------------------------------------------------------------|-------------------------------------------------------------------|----------------------------------|-------------------|----------------------------------------------------------------------------------|-----------------------------------------------------------------------------------------------------------|
|                           |                    |                                                                                      |                                |             |                        |                                                                             |                                                                   | Development of research question | Selection outcome | Other activities                                                                 | Dissemination and Implementation of results                                                               |
|                           |                    |                                                                                      |                                |             |                        |                                                                             |                                                                   |                                  |                   |                                                                                  | al. The PROactive innovative conceptual framework on physical activity. Eur Respir J 2014; 44: 1223–1233. |
| Kattelmann, K., 2014 [23] | USA                | The Effects of Young Adults Eating and Active for Health (YEAH): A Theory-Based Web- | Single site                    | 1639        | Nutrition and exercise | African-American, Asian, Native Hawaiian/Pacific Islander, American Indian, | Not reported                                                      | Not reported                     | Not reported      | The intervention was developed using the CBPR process of PRECEDE-PROCEED and was | Not reported                                                                                              |

**ADDITIONAL FILE 2**

**Table 2. Full study characteristics of included studies.**

† Denotes where excerpts are taken verbatim from study.

| Study | Country of conduct | Title                  | Multi-centre/<br>single centre | Sample Size | Field/Topic | Ethnic/Minority populations | Number of patients/ community representatives engaged in research | Methods of Engagement <sup>†</sup>      |                          |                         |                                                                                                                                                                                               |
|-------|--------------------|------------------------|--------------------------------|-------------|-------------|-----------------------------|-------------------------------------------------------------------|-----------------------------------------|--------------------------|-------------------------|-----------------------------------------------------------------------------------------------------------------------------------------------------------------------------------------------|
|       |                    |                        |                                |             |             |                             |                                                                   | <i>Development of research question</i> | <i>Selecting outcome</i> | <i>Other activities</i> | <i>Dissemination and Implementation of results</i>                                                                                                                                            |
|       |                    | Delivered Intervention |                                |             |             | Hispanic, and other         |                                                                   |                                         |                          |                         | delivered via the Web and e-mail.<br>Greene GW, White AA, Hoerr SL, et al.<br>Impact of an online healthful eating and physical activity program for college students.<br>Am J Health Promot. |

**ADDITIONAL FILE 2**

**Table 2. Full study characteristics of included studies.**

† Denotes where excerpts are taken verbatim from study.

| Study | Country of conduct | Title | Multi-centre/<br>single centre | Sample Size | Field/Topic | Ethnic/Minority populations | Number of patients/community representatives engaged in research | Methods of Engagement†           |                   |                  |                                             |
|-------|--------------------|-------|--------------------------------|-------------|-------------|-----------------------------|------------------------------------------------------------------|----------------------------------|-------------------|------------------|---------------------------------------------|
|       |                    |       |                                |             |             |                             |                                                                  | Development of research question | Selecting outcome | Other activities | Dissemination and Implementation of results |

2012;27:E4  
7-E58.
